# Supplementary material for: Analysis of Metabolite Profiling in Human Endothelial Cells after Plasma Jet Treatment
Source: Hindawi journal article supplement (doi:10.1155/2019/3015150), 2019-11-03
Supplement: f1 [file 3015150.f1.pdf]

## Additional file 1

| Peak       | Analyte | Similarity | R. T.     |   | Count | Mass |
|------------|---------|------------|-----------|---|-------|------|
|            |         |            | (minutes) | ) |       |      |
|            | NA      | Average    |           |   |       |      |
| Analyte 1  | 1       | 0          | 6.35267,0 |   | 8     | 57   |
| Analyte 2  | 2       | 0          | 6.36433,0 |   | 8     | 89   |
| Analyte 3  | 3       | 0          | 6.37133,0 |   | 7     | 63   |
| Analyte 4  | 4       | 0          | 6.39033,0 |   | 8     | 57   |
| Analyte 5  | 5       | 0          | 6.43067,0 |   | 4     | 204  |
| Analyte 6  | 6       | 0          | 6.44833,0 |   | 4     | 220  |
| Analyte 7  | 7       | 0          | 6.46089,0 |   | 6     | 86   |
| Analyte 8  | 8       | 0          | 6.463,0   |   | 8     | 281  |
| Analyte 9  | 9       | 0          | 6.49683,0 |   | 8     | 221  |
| Analyte 10 | 10      | 0          | 6.508,0   |   | 6     | 57   |
| Analyte 11 | 11      | 0          | 6.51583,0 |   | 8     | 102  |
| Analyte 12 | 12      | 0          | 6.53917,0 |   | 8     | 147  |
| Analyte 13 | 13      | 0          | 6.54767,0 |   | 4     | 152  |
| Analyte 14 | 14      | 0          | 6.58657,0 |   | 7     | 160  |
| Analyte 15 | 15      | 0          | 6.6524,0  |   | 5     | 143  |
| Analyte 16 | 16      | 0          | 6.66433,0 |   | 8     | 93   |
| Analyte 17 | 17      | 0          | 6.60829,0 |   | 7     | 170  |
| Analyte 18 | 18      | 0          | 6.71133,0 |   | 3     | 93   |
| Analyte 19 | 19      | 0          | 6.71633,0 |   | 8     | 117  |
| Analyte 20 | 20      | 0          | 6.72644,0 |   | 3     | 207  |
| Analyte 21 | 21      | 0          | 6.74267,0 |   | 8     | 57   |
| Analyte 22 | 22      | 0          | 6.74867,0 |   | 8     | 121  |
| Analyte 23 | 23      | 0          | 6.7775,0  |   | 8     | 144  |
| Analyte 24 | 24      | 0          | 6.79133,0 |   | 7     | 191  |
| Analyte 25 | 25      | 0          | 6.78767,0 |   | 8     | 281  |
| Analyte 26 | 26      | 0          | 6.81733,0 |   | 8     | 107  |
| Analyte 27 | 27      | 0          | 6.83233,0 |   | 8     | 57   |
| Analyte 28 | 28      | 0          | 6.8396,0  |   | 5     | 144  |
| Analyte 29 | 29      | 0          | 6.84783,0 |   | 8     | 248  |
| Analyte 30 | 30      | 0          | 6.89133,0 |   | 7     | 207  |
| Analyte 31 | 31      | 0          | 6.92217,0 |   | 8     | 70   |
| Analyte 32 | 32      | 0          | 6.9315,0  |   | 8     | 160  |
| Analyte 33 | 33      | 0          | 6.97817,0 |   | 8     | 71   |
| Analyte 34 | 34      | 0          | 6.99583,0 |   | 8     | 85   |
| Analyte 35 | 35      | 0          | 7.034,0   |   | 8     | 93   |
| Analyte 36 | 36      | 0          | 7.03952,0 |   | 7     | 248  |
| Analyte 37 | 37      | 0          | 7.06333,0 |   | 8     | 147  |
| Analyte 38 | 38      | 244        | 7.06981,0 |   | 7     | 89   |
| Analyte 39 | 39      | 0          | 7.11967,0 |   | 8     | 70   |

|                          |    |                |             |   |     |
|--------------------------|----|----------------|-------------|---|-----|
| Analyte 40               | 40 | 262            | 7. 12333, 0 | 3 | 172 |
| 2-hydroxypyridine        | 41 | 282            | 7. 13756, 0 | 6 | 136 |
| Analyte 42               | 42 | 0              | 7. 14383, 0 | 8 | 102 |
| Analyte 43               | 43 | 0              | 7. 1705, 0  | 8 | 207 |
| Analyte 44               | 44 | 225            | 7. 223, 0   | 8 | 58  |
| Analyte 45               | 45 | 281. 5         | 7. 25111, 0 | 6 | 119 |
| Analyte 46               | 46 | 0              | 7. 2705, 0  | 8 | 152 |
| Analyte 47               | 47 | 0              | 7. 27467, 0 | 4 | 318 |
| Analyte 48               | 48 | 0              | 7. 30783, 0 | 8 | 68  |
| Analyte 49               | 49 | 0              | 7. 31817, 0 | 8 | 229 |
| 2-ketobutyric acid 2     | 50 | 315. 375       | 7. 40333, 0 | 8 | 174 |
| unknown                  | 51 | 204            | 7. 40767, 0 | 4 | 56  |
| lactic acid              | 52 | 336. 6666<br>7 | 7. 422, 0   | 8 | 207 |
| unknown                  | 53 | 376            | 7. 45667, 0 | 6 | 158 |
| Analyte 54               | 54 | 0              | 7. 48283, 0 | 8 | 127 |
| Analyte 55               | 55 | 0              | 7. 52, 0    | 8 | 174 |
| unknown                  | 56 | 541. 75        | 7. 52467, 0 | 8 | 79  |
| glycolic acid            | 57 | 573. 5         | 7. 57767, 0 | 8 | 117 |
| unknown                  | 58 | 161. 4285<br>7 | 7. 58767, 0 | 8 | 79  |
| unknown                  | 59 | 568            | 7. 6265, 0  | 8 | 190 |
| unknown                  | 60 | 409. 8333<br>3 | 7. 63083, 0 | 8 | 221 |
| Analyte 61               | 61 | 0              | 7. 66133, 0 | 4 | 145 |
| Analyte 62               | 62 | 0              | 7. 65733, 0 | 8 | 71  |
| Analyte 63               | 63 | 0              | 7. 66133, 0 | 6 | 92  |
| Analyte 64               | 64 | 0              | 7. 69324, 0 | 7 | 225 |
| Analyte 65               | 65 | 0              | 7. 71183, 0 | 8 | 89  |
| Analyte 66               | 66 | 0              | 7. 773, 0   | 8 | 173 |
| Analyte 67               | 67 | 191. 5         | 7. 82233, 0 | 8 | 57  |
| Maleimide                | 68 | 226. 1666<br>7 | 7. 88517, 0 | 8 | 69  |
| Analyte 69               | 69 | 0              | 7. 865, 0   | 8 | 225 |
| Analyte 70               | 70 | 0              | 7. 93743, 0 | 7 | 147 |
| unknown                  | 71 | 212. 2         | 7. 94433, 0 | 8 | 69  |
| Analyte 72               | 72 | 0              | 7. 96417, 0 | 8 | 163 |
| unknown                  | 73 | 191            | 8. 01583, 0 | 8 | 85  |
| 2-keto-isovaleric acid 1 | 74 | 307. 2         | 8. 02778, 0 | 6 | 89  |
| Analyte 75               | 75 | 185. 3333<br>3 | 8. 04783, 0 | 8 | 101 |
| Analyte 76               | 76 | 0              | 8. 09587, 0 | 5 | 93  |
| Analyte 77               | 77 | 206            | 8. 11033, 0 | 4 | 157 |
| unknown                  | 78 | 240            | 8. 11767, 0 | 8 | 71  |

|                           |     |               |           |   |     |
|---------------------------|-----|---------------|-----------|---|-----|
| Analyte 79                | 79  | 399.5         | 8.16633,0 | 8 | 116 |
| Analyte 80                | 80  | 0             | 8.17317,0 | 8 | 107 |
| Analyte 81                | 81  | 268.5         | 8.20505,0 | 7 | 187 |
| unknown                   | 82  | 236.7142<br>9 | 8.21083,0 | 8 | 57  |
| Analyte 83                | 83  | 0             | 8.22422,0 | 3 | 244 |
| Analyte 84                | 84  | 213.6         | 8.29067,0 | 8 | 71  |
| Analyte 85                | 85  | 0             | 8.30733,0 | 4 | 208 |
| Analyte 86                | 86  | 0             | 8.36417,0 | 8 | 116 |
| Analyte 87                | 87  | 0             | 8.36933,0 | 4 | 273 |
| unknown                   | 88  | 200.5         | 8.39883,0 | 8 | 127 |
| Analyte 89                | 89  | 7             | 8.41178,0 | 3 | 238 |
| oxalic acid               | 90  | 561.75        | 8.45067,0 | 8 | 102 |
| Analyte 91                | 91  | 177           | 8.46133,0 | 8 | 299 |
| Analyte 92                | 92  | 399.5         | 8.55683,0 | 8 | 147 |
| unknown                   | 93  | 201.5         | 8.566,0   | 7 | 168 |
| Analyte 94                | 94  | 215           | 8.60486,0 | 7 | 130 |
| 2-Ketovaleric acid 2      | 95  | 373.3333<br>3 | 8.644,0   | 6 | 100 |
| unknown                   | 96  | 267.6666<br>7 | 8.65311,0 | 3 | 84  |
| sarcosine                 | 97  | 687           | 8.65833,0 | 4 | 116 |
| 3-Hydroxypropionic acid 1 | 98  | 494.5         | 8.71883,0 | 8 | 133 |
| 3-Hydroxypyridine         | 99  | 717.3333<br>3 | 8.73844,0 | 3 | 152 |
| Analyte 100               | 100 | 245           | 8.74638,0 | 7 | 267 |
| unknown                   | 101 | 467           | 8.75267,0 | 8 | 216 |
| unknown                   | 102 | 443.3333<br>3 | 8.77933,0 | 3 | 191 |
| unknown                   | 103 | 329           | 8.7804,0  | 5 | 191 |
| Analyte 104               | 104 | 0             | 8.80617,0 | 8 | 89  |
| Analyte 105               | 105 | 196.6         | 8.84117,0 | 8 | 142 |
| Analyte 106               | 106 | 167           | 8.86733,0 | 4 | 257 |
| Analyte 107               | 107 | 125.6666<br>7 | 8.88033,0 | 8 | 57  |
| Analyte 108               | 108 | 0             | 8.90253,0 | 5 | 242 |
| unknown                   | 109 | 379           | 8.91305,0 | 7 | 77  |
| Analyte 110               | 110 | 168.7142<br>9 | 8.94183,0 | 8 | 174 |
| Analyte 111               | 111 | 220           | 8.95567,0 | 4 | 392 |
| 3-hydroxybutyric acid     | 112 | 675.5714<br>3 | 8.979,0   | 8 | 147 |
| unknown                   | 113 | 456.375       | 9.01483,0 | 8 | 77  |
| unknown                   | 114 | 406.875       | 9.047,0   | 8 | 281 |

|                                        |     |               |           |   |     |
|----------------------------------------|-----|---------------|-----------|---|-----|
| Analyte 115                            | 115 | 201           | 9.05383,0 | 8 | 128 |
| sulfuric acid                          | 116 | 600.875       | 9.10033,0 | 8 | 147 |
| 2-amino-2-methylpropane-<br>1,3-diol 2 | 117 | 214.75        | 9.14448,0 | 7 | 187 |
| N-Methyl-DL-alanine                    | 118 | 743.625       | 9.15167,0 | 8 | 130 |
| Analyte 119                            | 119 | 0             | 9.188,0   | 8 | 207 |
| Analyte 120                            | 120 | 0             | 9.22017,0 | 8 | 267 |
| Analyte 121                            | 121 | 0             | 9.2356,0  | 5 | 221 |
| Methyl Phosphate                       | 122 | 834.875       | 9.23317,0 | 8 | 241 |
| Analyte 123                            | 123 | 0             | 9.274,0   | 7 | 267 |
| unknown                                | 124 | 527.25        | 9.28567,0 | 4 | 57  |
| Analyte 125                            | 125 | 203           | 9.28981,0 | 7 | 282 |
| Analyte 126                            | 126 | 0             | 9.38,0    | 8 | 211 |
| Analyte 127                            | 127 | 0             | 9.38689,0 | 3 | 116 |
| Analyte 128                            | 128 | 188           | 9.42733,0 | 4 | 151 |
| Analyte 129                            | 129 | 0             | 9.43044,0 | 3 | 171 |
| beta-Alanine 1                         | 130 | 960           | 9.4535,0  | 8 | 102 |
| Analyte 131                            | 131 | 0             | 9.47233,0 | 8 | 221 |
| malonic acid 1                         | 132 | 534           | 9.51517,0 | 8 | 147 |
| Analyte 133                            | 133 | 175.3333<br>3 | 9.57717,0 | 8 | 226 |
| Analyte 134                            | 134 | 207           | 9.59457,0 | 7 | 57  |
| unknown                                | 135 | 529.125       | 9.6065,0  | 8 | 147 |
| cycloleucine 2                         | 136 | 375.5         | 9.65967,0 | 8 | 57  |
| 3-Aminoisobutyric acid 2               | 137 | 408.5         | 9.69907,0 | 5 | 131 |
| valine                                 | 138 | 974.75        | 9.7785,0  | 8 | 144 |
| Analyte 139                            | 139 | 433.75        | 9.825,0   | 8 | 103 |
| Methylmalonic acid                     | 140 | 312.625       | 9.832,0   | 8 | 70  |
| Analyte 141                            | 141 | 326           | 9.8515,0  | 8 | 281 |
| Analyte 142                            | 142 | 211           | 9.87686,0 | 7 | 227 |
| Analyte 143                            | 143 | 162           | 9.89283,0 | 8 | 57  |
| Analyte 144                            | 144 | 181           | 9.92667,0 | 4 | 156 |
| Analyte 145                            | 145 | 180           | 9.91167,0 | 8 | 207 |
| unknown                                | 146 | 335.5         | 9.9585,0  | 8 | 71  |
| Analyte 147                            | 147 | 334           | 9.98162,0 | 7 | 217 |
| Carnitine                              | 148 | 313.8333<br>3 | 10.0212,0 | 8 | 116 |
| unknown                                | 149 | 253.5         | 10.0473,0 | 7 | 71  |
| Analyte 150                            | 150 | 336.25        | 10.0725,0 | 8 | 101 |
| 4-hydroxybutyrate                      | 151 | 894.875       | 10.078,0  | 8 | 147 |
| unknown                                | 152 | 202.375       | 10.0988,0 | 8 | 71  |
| Analyte 154                            | 154 | 272.5         | 10.2131,0 | 3 | 151 |
| 2-Butyne-1,4-diol                      | 155 | 281.75        | 10.2195,0 | 8 | 71  |
| 2-ketoadipate 3                        | 156 | 362.5         | 10.2323,0 | 8 | 96  |

|                                   |     |               |           |   |     |
|-----------------------------------|-----|---------------|-----------|---|-----|
| Carbobenzyloxy-L-leucine<br>degr1 | 157 | 363.25        | 10.2555,0 | 8 | 100 |
| Dihydroxyacetone                  | 158 | 660.125       | 10.2785,0 | 8 | 89  |
| unknown                           | 159 | 197.375       | 10.301,0  | 8 | 57  |
| Analyte 160                       | 160 | 252           | 10.3087,0 | 5 | 113 |
| benzoic acid                      | 161 | 787           | 10.329,0  | 8 | 179 |
| unknown                           | 162 | 172.75        | 10.3871,0 | 5 | 175 |
| unknown                           | 163 | 176.3333<br>3 | 10.3915,0 | 8 | 71  |
| unknown                           | 164 | 399           | 10.4464,0 | 3 | 143 |
| Analyte 165                       | 165 | 283.25        | 10.4738,0 | 6 | 318 |
| unknown                           | 166 | 266.8         | 10.4713,0 | 8 | 163 |
| Ethanolamine                      | 167 | 826.75        | 10.4985,0 | 8 | 174 |
| Analyte 168                       | 168 | 199.6666<br>7 | 10.5218,0 | 8 | 85  |
| unknown                           | 169 | 736.1428<br>6 | 10.5591,0 | 7 | 50  |
| unknown                           | 170 | 791.25        | 10.5673,0 | 8 | 158 |
| glycerol                          | 171 | 682.125       | 10.6148,0 | 8 | 204 |
| unknown                           | 172 | 347.8         | 10.6282,0 | 8 | 171 |
| phosphate                         | 173 | 871.25        | 10.6668,0 | 8 | 133 |
| Analyte 174                       | 174 | 349           | 10.6749,0 | 3 | 51  |
| unknown                           | 175 | 726.375       | 10.6668,0 | 8 | 158 |
| 2-Deoxyuridine                    | 176 | 280.625       | 10.714,0  | 8 | 71  |
| Analyte 177                       | 177 | 336.3333<br>3 | 10.7478,0 | 8 | 175 |
| unknown                           | 178 | 227.6666<br>7 | 10.7857,0 | 5 | 162 |
| 3-hydroxypyruvate                 | 179 | 345.875       | 10.8158,0 | 8 | 150 |
| unknown                           | 180 | 251.75        | 10.8372,0 | 8 | 71  |
| 4-Vinylphenol                     | 181 | 220           | 10.8987,0 | 4 | 151 |
| Isoleucine                        | 182 | 945.625       | 10.8923,0 | 8 | 158 |
| L-Allothreonine 2                 | 183 | 494.5         | 10.9153,0 | 3 | 341 |
| unknown                           | 184 | 721.75        | 10.9767,0 | 5 | 161 |
| proline                           | 185 | 808.75        | 10.9827,0 | 4 | 79  |
| unknown                           | 186 | 301           | 10.9753,0 | 3 | 221 |
| proline                           | 187 | 938.375       | 10.979,0  | 8 | 142 |
| unknown                           | 188 | 750.6666<br>7 | 10.9718,0 | 3 | 194 |
| unknown                           | 189 | 380           | 11.0192,0 | 8 | 71  |
| maleic acid                       | 190 | 298.1428<br>6 | 11.0342,0 | 8 | 370 |
| glycine 2                         | 191 | 975.75        | 11.0703,0 | 8 | 174 |
| 1,4-Cyclohexanedione 2            | 192 | 364.25        | 11.0775,0 | 8 | 69  |

|                             |     |               |           |   |     |
|-----------------------------|-----|---------------|-----------|---|-----|
| 1,3-Cyclohexanedione 2      | 193 | 214.4         | 11.102,0  | 8 | 113 |
| unknown                     | 194 | 243.6666<br>7 | 11.135,0  | 4 | 140 |
| unknown                     | 195 | 333.5         | 11.1523,0 | 8 | 71  |
| succinic acid               | 196 | 955.25        | 11.1802,0 | 8 | 147 |
| 2,3-Dihydroxypyridine       | 197 | 276.375       | 11.1903,0 | 8 | 69  |
| unknown                     | 198 | 273           | 11.1976,0 | 3 | 281 |
| Bis(2-hydroxypropyl)amine 1 | 199 | 292           | 11.2113,0 | 3 | 160 |
| unknown                     | 200 | 407.7142<br>9 | 11.251,0  | 7 | 130 |
| Analyte 201                 | 201 | 172           | 11.2732,0 | 8 | 99  |
| unknown                     | 202 | 306.5         | 11.2847,0 | 8 | 315 |
| Analyte 203                 | 203 | 196           | 11.2977,0 | 4 | 466 |
| unknown                     | 204 | 234.5         | 11.3048,0 | 8 | 69  |
| Analyte 205                 | 205 | 219           | 11.3345,0 | 8 | 252 |
| Analyte 206                 | 206 | 349.25        | 11.347,0  | 8 | 71  |
| Norleucine 1                | 207 | 228           | 11.4048,0 | 8 | 215 |
| Thymol                      | 208 | 315.5         | 11.4151,0 | 6 | 73  |
| Analyte 209                 | 209 | 133.75        | 11.4791,0 | 6 | 71  |
| Analyte 210                 | 210 | 0             | 11.494,0  | 8 | 241 |
| Analyte 211                 | 211 | 0             | 11.494,0  | 6 | 207 |
| Analyte 212                 | 212 | 154           | 11.5712,0 | 8 | 152 |
| uracil                      | 213 | 233.625       | 11.5915,0 | 8 | 71  |
| Analyte 214                 | 214 | 107           | 11.6173,0 | 6 | 80  |
| Citraconic acid 4           | 215 | 497.7142<br>9 | 11.6602,0 | 8 | 235 |
| fumaric acid                | 216 | 949.375       | 11.6708,0 | 8 | 245 |
| unknown                     | 217 | 142.8571<br>4 | 11.7262,0 | 8 | 71  |
| Analyte 218                 | 218 | 223           | 11.7533,0 | 8 | 340 |
| serine 1                    | 219 | 961.25        | 11.7643,0 | 8 | 204 |
| Pyrrole-2-Carboxylic Acid   | 220 | 316.5         | 11.775,0  | 8 | 241 |
| 2,3-Dimethylsuccinic acid   | 221 | 476.25        | 11.782,0  | 4 | 293 |
| Pelargonic acid             | 222 | 900           | 11.8343,0 | 8 | 117 |
| unknown                     | 223 | 215           | 11.8535,0 | 8 | 255 |
| unknown                     | 224 | 309.6         | 11.8677,0 | 7 | 156 |
| Analyte 225                 | 225 | 170.3333<br>3 | 11.9177,0 | 8 | 57  |
| Analyte 226                 | 226 | 144.5         | 11.9255,0 | 8 | 340 |
| Analyte 227                 | 227 | 0             | 11.9557,0 | 4 | 152 |
| 3-Cyanoalanine              | 228 | 739.875       | 11.953,0  | 8 | 141 |
| unknown                     | 229 | 334.5         | 11.9611,0 | 3 | 242 |
| unknown                     | 230 | 125.8         | 12.0176,0 | 6 | 57  |
| Analyte 231                 | 231 | 0             | 12.0765,0 | 8 | 298 |

|                           |     |               |           |   |     |
|---------------------------|-----|---------------|-----------|---|-----|
| threonine 1               | 232 | 949.625       | 12.0977,0 | 8 | 219 |
| N-Acetyl-beta-alanine 2   | 233 | 240.2         | 12.2252,0 | 8 | 113 |
| Tartronic acid            | 234 | 315           | 12.2413,0 | 8 | 191 |
| Analyte 235               | 235 | 0             | 12.2767,0 | 3 | 305 |
| Analyte 236               | 236 | 226           | 12.2835,0 | 7 | 204 |
| thymine                   | 237 | 769.875       | 12.321,0  | 8 | 255 |
| Analyte 238               | 238 | 53            | 12.3475,0 | 8 | 57  |
| Glutaric Acid             | 239 | 355.8         | 12.3978,0 | 6 | 234 |
| Analyte 240               | 240 | 306.4         | 12.4055,0 | 8 | 57  |
| Analyte 241               | 241 | 139           | 12.4125,0 | 8 | 373 |
| Analyte 242               | 242 | 66            | 12.4232,0 | 8 | 191 |
| unknown                   | 243 | 479           | 12.4688,0 | 8 | 270 |
| DL-Anabesine 1            | 244 | 225.5         | 12.5146,0 | 7 | 211 |
| Analyte 245               | 245 | 258           | 12.5269,0 | 3 | 229 |
| unknown                   | 246 | 207.5         | 12.5432,0 | 8 | 57  |
| Analyte 247               | 247 | 244.75        | 12.5522,0 | 8 | 99  |
| Analyte 248               | 248 | 0             | 12.5596,0 | 5 | 327 |
| Biuret 3                  | 249 | 258.875       | 12.5978,0 | 8 | 57  |
| Analyte 250               | 250 | 242           | 12.6085,0 | 8 | 218 |
| methyl trans-cinnamate    | 251 | 205           | 12.634,0  | 6 | 211 |
| aspartic acid 2           | 252 | 873.375       | 12.6533,0 | 8 | 160 |
| unknown                   | 253 | 373.875       | 12.6663,0 | 8 | 258 |
| beta-Alanine 2            | 254 | 819.75        | 12.6795,0 | 8 | 248 |
| N-Ethylglycine 1          | 255 | 442.5         | 12.7228,0 | 8 | 174 |
| N-Acetyl-L-leucine 3      | 256 | 228.3333<br>3 | 12.7777,0 | 5 | 218 |
| Maleamate 4               | 257 | 402.5714<br>3 | 12.8577,0 | 8 | 216 |
| Analyte 258               | 258 | 0             | 12.9611,0 | 3 | 218 |
| Erythrose 1               | 259 | 529.75        | 12.9782,0 | 8 | 350 |
| unknown                   | 260 | 246.8         | 12.9825,0 | 5 | 71  |
| 5-Methylresorcinol        | 261 | 330.375       | 13.0567,0 | 8 | 252 |
| 2,4-diaminobutyric acid 3 | 262 | 434.4285<br>7 | 13.0616,0 | 7 | 128 |
| unknown                   | 263 | 349.25        | 13.0823,0 | 8 | 174 |
| Capric Acid               | 264 | 609.4285<br>7 | 13.0995,0 | 7 | 117 |
| Analyte 265               | 265 | 209.8         | 13.1148,0 | 8 | 57  |
| Analyte 266               | 266 | 0             | 13.1629,0 | 6 | 281 |
| unknown                   | 267 | 374.25        | 13.1968,0 | 8 | 72  |
| Aminomalonic acid         | 268 | 866.625       | 13.2022,0 | 8 | 218 |
| Analyte 269               | 269 | 67.33333      | 13.2664,0 | 6 | 239 |
| unknown                   | 270 | 559.75        | 13.2875,0 | 8 | 68  |

|                                       |     |               |           |   |     |
|---------------------------------------|-----|---------------|-----------|---|-----|
| unknown                               | 271 | 329.2857<br>1 | 13.296,0  | 8 | 73  |
| unknown                               | 272 | 198.2         | 13.3471,0 | 7 | 71  |
| unknown                               | 273 | 230.3333<br>3 | 13.361,0  | 8 | 160 |
| L-Malic acid                          | 274 | 941.125       | 13.4255,0 | 8 | 73  |
| unknown                               | 275 | 304.25        | 13.4681,0 | 7 | 85  |
| Analyte 276                           | 276 | 351.3333<br>3 | 13.4742,0 | 7 | 128 |
| Ethyl cinnamate                       | 277 | 295.7142<br>9 | 13.485,0  | 7 | 159 |
| Analyte 278                           | 278 | 0             | 13.5213,0 | 8 | 71  |
| Analyte 279                           | 279 | 407.3333<br>3 | 13.5364,0 | 5 | 217 |
| nicotinamide                          | 280 | 853.375       | 13.563,0  | 8 | 179 |
| unknown                               | 281 | 426.5714<br>3 | 13.5841,0 | 7 | 191 |
| Analyte 282                           | 282 | 220           | 13.6347,0 | 4 | 57  |
| Threitol                              | 283 | 914.25        | 13.642,0  | 8 | 217 |
| unknown                               | 284 | 367.2         | 13.6892,0 | 7 | 102 |
| asparagine 4                          | 285 | 942.625       | 13.6962,0 | 8 | 100 |
| Analyte 286                           | 286 | 420.4         | 13.7322,0 | 8 | 186 |
| Analyte 287                           | 287 | 192.5         | 13.7717,0 | 4 | 84  |
| unknown                               | 288 | 185.25        | 13.7693,0 | 8 | 71  |
| methionine 1                          | 289 | 671.75        | 13.8632,0 | 8 | 176 |
| aspartic acid 1                       | 290 | 922.5         | 13.8832,0 | 8 | 232 |
| unknown                               | 291 | 746.8         | 13.9124,0 | 5 | 79  |
| trans-4-hydroxy-L-proline 2           | 292 | 818.625       | 13.9405,0 | 8 | 304 |
| oxoproline                            | 293 | 925           | 13.9617,0 | 8 | 58  |
| Analyte 294                           | 294 | 298.5         | 13.9589,0 | 3 | 211 |
| oxoproline                            | 295 | 834.4285<br>7 | 13.9647,0 | 7 | 254 |
| 4-aminobutyric acid 1                 | 296 | 755           | 13.9922,0 | 8 | 304 |
| Analyte 297                           | 297 | 191           | 14.0028,0 | 7 | 314 |
| Analyte 298                           | 298 | 131.8         | 14.0138,0 | 8 | 447 |
| L-glutamic acid                       | 299 | 915.125       | 14.0245,0 | 8 | 186 |
| unknown                               | 300 | 345.5714<br>3 | 14.0622,0 | 8 | 185 |
| Analyte 301                           | 301 | 506           | 14.0717,0 | 8 | 292 |
| glutamine 3                           | 302 | 297.375       | 14.0935,0 | 8 | 71  |
| Analyte 303                           | 303 | 367.5         | 14.1138,0 | 8 | 245 |
| Analyte 304                           | 304 | 221           | 14.1273,0 | 8 | 263 |
| 2-Amino-2-norbornanecarboxylic acid 1 | 305 | 271.2         | 14.2173,0 | 6 | 69  |



|                                           |     |               |           |   |     |
|-------------------------------------------|-----|---------------|-----------|---|-----|
| unknown                                   | 306 | 247.1666<br>7 | 14.2137,0 | 8 | 85  |
| L-cysteine                                | 307 | 831           | 14.2778,0 | 8 | 115 |
| Analyte 308                               | 308 | 375           | 14.28,0   | 4 | 115 |
| Analyte 309                               | 309 | 0             | 14.3335,0 | 8 | 71  |
| Analyte 310                               | 310 | 244           | 14.3362,0 | 3 | 111 |
| unknown                                   | 311 | 377.1428<br>6 | 14.3655,0 | 8 | 218 |
| Analyte 312                               | 312 | 274           | 14.4071,0 | 7 | 89  |
| Threonic acid                             | 313 | 284.25        | 14.4247,0 | 4 | 86  |
| Dodecanol                                 | 314 | 324.5         | 14.4706,0 | 7 | 71  |
| 2-hydroxy-3-<br>isopropylbutanedioic acid | 315 | 477           | 14.4917,0 | 8 | 129 |
| alpha-ketoglutaric acid                   | 316 | 449.8333<br>3 | 14.5153,0 | 6 | 192 |
| creatine                                  | 317 | 326.875       | 14.524,0  | 8 | 299 |
| Analyte 318                               | 318 | 254           | 14.5304,0 | 3 | 82  |
| N(epsilon)-Trimethyllysine                | 319 | 230.625       | 14.5887,0 | 8 | 71  |
| glycocyanine 1                            | 320 | 219.6         | 14.6063,0 | 8 | 273 |
| unknown                                   | 321 | 332.875       | 14.6192,0 | 8 | 142 |
| unknown                                   | 322 | 406.5714<br>3 | 14.6321,0 | 7 | 218 |
| Analyte 323                               | 323 | 155.6666<br>7 | 14.6745,0 | 5 | 71  |
| Analyte 324                               | 324 | 0             | 14.7835,0 | 7 | 235 |
| 3-hydroxy-3-methylglutaric<br>acid        | 325 | 484.6666<br>7 | 14.8153,0 | 3 | 239 |
| threo-beta-hydroxyaspartate<br>2          | 326 | 463.2857<br>1 | 14.8248,0 | 8 | 188 |
| Tropic Acid                               | 327 | 360.1666<br>7 | 14.8348,0 | 7 | 119 |
| Phenylphosphoric acid                     | 328 | 478           | 14.8437,0 | 8 | 211 |
| D-erythronolactone 2                      | 329 | 487.875       | 14.8603,0 | 8 | 231 |
| Digitoxose 2                              | 330 | 261           | 14.8752,0 | 8 | 113 |
| hexadecane                                | 331 | 525.375       | 14.8962,0 | 8 | 57  |
| unknown                                   | 332 | 231.4285<br>7 | 14.914,0  | 7 | 241 |
| unknown                                   | 333 | 660           | 14.974,0  | 8 | 142 |
| Analyte 334                               | 334 | 29.83333      | 15.0296,0 | 7 | 244 |
| unknown                                   | 335 | 765.4285<br>7 | 15.0428,0 | 7 | 137 |
| glutamic acid                             | 336 | 828.375       | 15.0517,0 | 8 | 246 |
| Analyte 337                               | 337 | 0             | 15.0827,0 | 8 | 298 |
| thymidine 2                               | 338 | 311           | 15.1403,0 | 4 | 299 |

|                             |     |               |           |   |     |
|-----------------------------|-----|---------------|-----------|---|-----|
| unknown                     | 339 | 400.5         | 15.1498,0 | 8 | 218 |
| toluenesulfonic acid        | 340 | 439.125       | 15.175,0  | 8 | 229 |
| 4-Hydroxybenzoic acid       | 341 | 565           | 15.1849,0 | 5 | 223 |
| unknown                     | 342 | 258.6666<br>7 | 15.1942,0 | 7 | 71  |
| Analyte 343                 | 343 | 288.5         | 15.2198,0 | 3 | 258 |
| unknown                     | 344 | 404.4285<br>7 | 15.2689,0 | 7 | 147 |
| Cytosin                     | 345 | 406           | 15.2768,0 | 8 | 326 |
| 4-hydroxyphenylacetic acid  | 346 | 321.7142<br>9 | 15.315,0  | 8 | 114 |
| unknown                     | 347 | 169           | 15.3479,0 | 5 | 380 |
| Fluorene                    | 348 | 550.6666<br>7 | 15.3504,0 | 3 | 380 |
| Analyte 349                 | 349 | 248.5         | 15.371,0  | 8 | 211 |
| Lyxose 1                    | 350 | 348.2857<br>1 | 15.4319,0 | 7 | 248 |
| lauric acid                 | 351 | 778.125       | 15.465,0  | 8 | 117 |
| pyrophosphate 3             | 352 | 939           | 15.4795,0 | 8 | 451 |
| N-acetyl-L-aspartic acid 1  | 353 | 623.125       | 15.4893,0 | 8 | 158 |
| Analyte 354                 | 354 | 194           | 15.5428,0 | 5 | 128 |
| Analyte 355                 | 355 | 167           | 15.5607,0 | 8 | 156 |
| 1,3-diaminopropane          | 356 | 429.125       | 15.6078,0 | 8 | 326 |
| asparagine 1                | 357 | 800.875       | 15.6187,0 | 8 | 116 |
| ribose                      | 358 | 796.125       | 15.6367,0 | 8 | 103 |
| Analyte 359                 | 359 | 254.5714<br>3 | 15.7088,0 | 8 | 57  |
| Ribonic acid, gamma-lactone | 360 | 587.625       | 15.7365,0 | 8 | 115 |
| Analyte 361                 | 361 | 191.8333<br>3 | 15.7743,0 | 8 | 279 |
| Analyte 362                 | 362 | 132.7142<br>9 | 15.7993,0 | 8 | 71  |
| unknown                     | 363 | 288           | 15.8573,0 | 6 | 188 |
| cyclohexylsulfamic acid 1   | 364 | 288           | 15.8629,0 | 3 | 73  |
| Analyte 365                 | 365 | 300           | 15.8761,0 | 7 | 368 |
| phthalic acid               | 366 | 293.5         | 15.8869,0 | 3 | 221 |
| Analyte 367                 | 367 | 131           | 15.9167,0 | 8 | 282 |
| Analyte 368                 | 368 | 0             | 15.9423,0 | 8 | 241 |
| xylitol                     | 369 | 767.5         | 15.9572,0 | 8 | 217 |
| 3,6-Anhydro-D-galactose 1   | 370 | 250.5         | 15.9722,0 | 8 | 57  |
| unknown                     | 371 | 278.375       | 15.9952,0 | 8 | 257 |
| N-formyl-L-methionine 2     | 372 | 268.25        | 16.0288,0 | 8 | 71  |
| Analyte 373                 | 373 | 212.6         | 16.0373,0 | 6 | 126 |
| Analyte 374                 | 374 | 263.5         | 16.0753,0 | 4 | 57  |

|                                          |     |                |             |   |     |
|------------------------------------------|-----|----------------|-------------|---|-----|
| alpha-Aminoadipic acid                   | 375 | 471            | 16. 1187, 0 | 4 | 260 |
| Methoxamedrine 2                         | 376 | 235. 8         | 16. 1595, 0 | 8 | 154 |
| ribitol                                  | 377 | 830. 4         | 16. 1673, 0 | 5 | 94  |
| IS                                       | 378 | 734            | 16. 2017, 0 | 8 | 226 |
| beta-Glycerophosphoric acid              | 379 | 790. 6666<br>7 | 16. 2038, 0 | 3 | 299 |
| Acetol 5                                 | 380 | 446. 25        | 16. 2147, 0 | 4 | 79  |
| Analyte 381                              | 381 | 151            | 16. 2816, 0 | 3 | 71  |
| unknown                                  | 382 | 221. 8333<br>3 | 16. 3094, 0 | 7 | 180 |
| 2-Amino-1-phenylethanol                  | 384 | 651. 75        | 16. 3815, 0 | 8 | 174 |
| unknown                                  | 385 | 295. 5         | 16. 4069, 0 | 3 | 71  |
| Diglycerol 2                             | 386 | 586            | 16. 4127, 0 | 3 | 217 |
| Analyte 387                              | 387 | 212. 3333<br>3 | 16. 4407, 0 | 8 | 207 |
| unknown                                  | 388 | 271. 6666<br>7 | 16. 4813, 0 | 8 | 248 |
| unknown                                  | 389 | 385. 75        | 16. 5173, 0 | 8 | 71  |
| unknown                                  | 390 | 738. 125       | 16. 6043, 0 | 8 | 96  |
| D-(glycerol 1-phosphate)                 | 391 | 885. 375       | 16. 615, 0  | 8 | 73  |
| Analyte 392                              | 392 | 167            | 16. 6487, 0 | 5 | 266 |
| unknown                                  | 393 | 631. 2857<br>1 | 16. 6323, 0 | 8 | 84  |
| Glucose-1-phosphate                      | 394 | 619. 25        | 16. 668, 0  | 8 | 217 |
| Analyte 395                              | 395 | 392            | 16. 7361, 0 | 7 | 207 |
| unknown                                  | 397 | 697. 4285<br>7 | 16. 7927, 0 | 7 | 274 |
| 2-deoxy-D-glucose 1                      | 398 | 332. 6666<br>7 | 16. 8313, 0 | 3 | 117 |
| O-Phosphorylethanolamine                 | 399 | 888. 375       | 16. 8477, 0 | 8 | 174 |
| unknown                                  | 400 | 582. 25        | 16. 8553, 0 | 4 | 284 |
| N-Acetyl-L-glutamic acid 2               | 401 | 494            | 16. 8948, 0 | 8 | 84  |
| (2R)-2-amino-3-phosphonopropanoic acid 2 | 402 | 245. 375       | 16. 93, 0   | 8 | 156 |
| unknown                                  | 403 | 208. 625       | 16. 9635, 0 | 8 | 71  |
| thymidine 5'-monophosphate<br>degr prod  | 404 | 591. 7142<br>9 | 16. 9727, 0 | 7 | 81  |
| terephthalic acid                        | 405 | 361. 75        | 16. 9943, 0 | 8 | 295 |
| unknown                                  | 406 | 283. 625       | 17. 016, 0  | 8 | 69  |
| 9-Fluorenone 2                           | 407 | 389. 8         | 17. 0359, 0 | 5 | 75  |
| unknown                                  | 408 | 304. 7142<br>9 | 17. 0424, 0 | 7 | 128 |
| 3-phosphoglycerate                       | 409 | 519. 1428<br>6 | 17. 0763, 0 | 7 | 227 |

|                                 |     |               |           |   |     |
|---------------------------------|-----|---------------|-----------|---|-----|
| hypoxanthine 1                  | 410 | 927.375       | 17.178,0  | 8 | 265 |
| Cysteinylglycine 3              | 411 | 767.5         | 17.2092,0 | 8 | 257 |
| ornithine 1                     | 412 | 852.625       | 17.2162,0 | 8 | 142 |
| unknown                         | 413 | 408           | 17.2873,0 | 6 | 174 |
| citric acid                     | 414 | 371.625       | 17.2975,0 | 8 | 273 |
| citrulline 1                    | 415 | 637.125       | 17.3057,0 | 8 | 256 |
| alpha-D-glucosamine 1-phosphate | 416 | 669.75        | 17.3453,0 | 8 | 147 |
| Analyte 417                     | 417 | 359           | 17.382,0  | 3 | 283 |
| O-Phosphoserine 1               | 418 | 682           | 17.3935,0 | 8 | 356 |
| Tagatose 1                      | 419 | 637.875       | 17.4485,0 | 8 | 217 |
| unknown                         | 420 | 393.75        | 17.4952,0 | 8 | 356 |
| unknown                         | 421 | 286.375       | 17.5075,0 | 8 | 57  |
| S-carboxymethylcysteine 2       | 422 | 303.375       | 17.5562,0 | 8 | 232 |
| Myristic Acid                   | 423 | 934           | 17.6035,0 | 8 | 117 |
| methionine sulfoxide 1          | 424 | 302.5         | 17.6258,0 | 8 | 174 |
| beta-Mannosylglycerate 2        | 425 | 516.75        | 17.6647,0 | 4 | 217 |
| unknown                         | 426 | 216.8333<br>3 | 17.673,0  | 8 | 366 |
| O-phosphonothreonine 4          | 427 | 251.6666<br>7 | 17.6828,0 | 5 | 273 |
| fructose 1                      | 428 | 912           | 17.7265,0 | 8 | 103 |
| Analyte 429                     | 429 | 159.125       | 17.7703,0 | 8 | 318 |
| sorbose 1                       | 430 | 203.2857<br>1 | 17.8155,0 | 8 | 149 |
| unknown                         | 431 | 744.375       | 17.8247,0 | 8 | 103 |
| Gluconic lactone 1              | 432 | 636.1666<br>7 | 17.8307,0 | 6 | 129 |
| Lumazine                        | 433 | 353.5714<br>3 | 17.87,0   | 7 | 309 |
| Allantoic acid 2                | 434 | 420.25        | 17.9475,0 | 8 | 231 |
| unknown                         | 435 | 319           | 17.9538,0 | 8 | 57  |
| unknown                         | 436 | 466.7142<br>9 | 17.979,0  | 7 | 318 |
| glucose 1                       | 437 | 866.625       | 17.9903,0 | 8 | 205 |
| tyrosine 2                      | 438 | 896.875       | 17.9992,0 | 8 | 179 |
| D-Talose 1                      | 439 | 273.4285<br>7 | 18.0534,0 | 7 | 191 |
| dl-p-Hydroxyphenyllactic acid   | 440 | 599.6         | 18.0692,0 | 5 | 308 |
| unknown                         | 441 | 409.5         | 18.0768,0 | 8 | 284 |
| Analyte 442                     | 442 | 0             | 18.1144,0 | 3 | 55  |
| unknown                         | 443 | 275.5         | 18.1317,0 | 4 | 235 |
| unknown                         | 444 | 678.25        | 18.1512,0 | 8 | 87  |

|                                         |     |               |           |   |     |
|-----------------------------------------|-----|---------------|-----------|---|-----|
| D-Altrose 1                             | 445 | 340.25        | 18.1631,0 | 5 | 292 |
| galactose 2                             | 446 | 828.625       | 18.1923,0 | 8 | 73  |
| unknown                                 | 447 | 230.5         | 18.2087,0 | 4 | 203 |
| unknown                                 | 448 | 322.7142<br>9 | 18.2263,0 | 8 | 58  |
| Atrazine-2-hydroxy 5                    | 449 | 300.875       | 18.2695,0 | 8 | 71  |
| lysine                                  | 450 | 906.625       | 18.2993,0 | 8 | 174 |
| Methyl Palmitoleate                     | 451 | 446.75        | 18.312,0  | 8 | 81  |
| mannitol                                | 452 | 710.25        | 18.326,0  | 8 | 205 |
| unknown                                 | 453 | 348           | 18.374,0  | 8 | 86  |
| unknown                                 | 454 | 302.3333<br>3 | 18.3791,0 | 6 | 57  |
| sorbitol                                | 455 | 951.25        | 18.392,0  | 8 | 217 |
| unknown                                 | 456 | 424.125       | 18.4397,0 | 8 | 86  |
| unknown                                 | 457 | 679           | 18.4455,0 | 8 | 159 |
| glucuronic acid 2                       | 458 | 416.6666<br>7 | 18.4513,0 | 3 | 275 |
| tyrosine 1                              | 459 | 948.25        | 18.4848,0 | 8 | 218 |
| conduritol b epoxide 2                  | 460 | 685.8333<br>3 | 18.5453,0 | 6 | 103 |
| unknown                                 | 461 | 256.2857<br>1 | 18.573,0  | 8 | 69  |
| Sedoheptulose                           | 462 | 351.25        | 18.578,0  | 4 | 159 |
| pentadecanoic acid                      | 463 | 775.5         | 18.6028,0 | 8 | 117 |
| unknown                                 | 464 | 239.625       | 18.6328,0 | 8 | 85  |
| unknown                                 | 465 | 278.6666<br>7 | 18.662,0  | 8 | 72  |
| D-galacturonic acid 2                   | 466 | 605.625       | 18.6705,0 | 8 | 73  |
| unknown                                 | 467 | 317           | 18.6963,0 | 8 | 85  |
| unknown                                 | 468 | 616           | 18.7023,0 | 4 | 217 |
| 1-Hexadecanol                           | 469 | 764.875       | 18.725,0  | 8 | 75  |
| Analyte 470                             | 470 | 243           | 18.7478,0 | 8 | 85  |
| 3,5-Dihydroxyphenylglycine<br>2         | 471 | 233           | 18.7627,0 | 4 | 283 |
| unknown                                 | 472 | 282           | 18.7913,0 | 6 | 204 |
| Analyte 473                             | 473 | 0             | 18.7985,0 | 8 | 149 |
| 4-hydroxy-3-<br>methoxycinnamaldehyde 2 | 474 | 283.5         | 18.846,0  | 8 | 146 |
| Analyte 475                             | 475 | 216.5         | 18.8725,0 | 8 | 71  |
| N-alpha-Acetyl-L-ornithine<br>1         | 476 | 260           | 18.92,0   | 6 | 415 |
| Analyte 477                             | 477 | 204           | 18.9544,0 | 3 | 71  |
| Analyte 478                             | 478 | 339.6         | 18.9722,0 | 8 | 221 |
| pantothenic acid                        | 479 | 961.5         | 18.9885,0 | 8 | 103 |

|                                  |     |               |           |   |     |
|----------------------------------|-----|---------------|-----------|---|-----|
| Analyte 480                      | 480 | 315.5         | 19.0283,0 | 8 | 230 |
| unknown                          | 481 | 338           | 19.038,0  | 6 | 217 |
| Analyte 482                      | 482 | 233.5         | 19.0533,0 | 6 | 204 |
| unknown                          | 483 | 461.75        | 19.1133,0 | 8 | 293 |
| Galactonic acid                  | 484 | 784.125       | 19.1542,0 | 8 | 73  |
| Guanidinosuccinic acid 3         | 485 | 262.1666<br>7 | 19.2222,0 | 6 | 297 |
| cytidine-monophosphate 1         | 486 | 870.125       | 19.2528,0 | 8 | 243 |
| Analyte 487                      | 487 | 0             | 19.2902,0 | 8 | 318 |
| unknown                          | 488 | 792.75        | 19.3172,0 | 8 | 117 |
| unknown                          | 489 | 289.8571<br>4 | 19.3538,0 | 7 | 286 |
| palmitoleic acid                 | 490 | 910.25        | 19.3665,0 | 8 | 129 |
| Glucosaminic acid                | 491 | 245.75        | 19.408,0  | 8 | 294 |
| unknown                          | 492 | 347.6666<br>7 | 19.5467,0 | 4 | 357 |
| unknown                          | 493 | 306           | 19.5464,0 | 3 | 164 |
| unknown                          | 494 | 281.3333<br>3 | 19.5653,0 | 6 | 369 |
| palmitic acid                    | 495 | 969.375       | 19.5802,0 | 8 | 117 |
| unknown                          | 496 | 495.5         | 19.5903,0 | 4 | 220 |
| mucic acid                       | 497 | 354           | 19.6263,0 | 4 | 174 |
| unknown                          | 498 | 481.875       | 19.6903,0 | 8 | 205 |
| unknown                          | 499 | 455.125       | 19.7088,0 | 8 | 73  |
| N-Acetyl-D-galactosamine 1       | 500 | 860.5         | 19.7882,0 | 8 | 87  |
| unknown                          | 501 | 596.375       | 19.7615,0 | 8 | 131 |
| unknown                          | 502 | 290.1428<br>6 | 19.8113,0 | 7 | 326 |
| myo-inositol                     | 503 | 935.625       | 19.9148,0 | 8 | 318 |
| unknown                          | 504 | 799.8         | 19.9177,0 | 5 | 58  |
| unknown                          | 505 | 561.875       | 19.9832,0 | 8 | 87  |
| ribose-5-phosphate 2             | 506 | 774           | 20.0304,0 | 7 | 315 |
| unknown                          | 507 | 698.875       | 19.9792,0 | 8 | 205 |
| unknown                          | 508 | 258.8571<br>4 | 20.0586,0 | 7 | 86  |
| Linoleic acid methyl ester       | 509 | 374.125       | 20.1162,0 | 8 | 203 |
| ribulose-5-phosphate 1           | 510 | 552.5         | 20.1337,0 | 8 | 357 |
| N-Acetyl-beta-D-mannosamine<br>4 | 511 | 760.125       | 20.151,0  | 8 | 205 |
| unknown                          | 512 | 365.2         | 20.1724,0 | 5 | 81  |
| unknown                          | 513 | 320.4285<br>7 | 20.1906,0 | 7 | 211 |
| Analyte 514                      | 514 | 0             | 20.2223,0 | 5 | 132 |
| unknown                          | 515 | 312.75        | 20.2666,0 | 7 | 129 |

|                                         |     |               |           |   |     |
|-----------------------------------------|-----|---------------|-----------|---|-----|
| guanine 1                               | 516 | 873.375       | 20.2818,0 | 8 | 352 |
| unknown                                 | 517 | 285.8         | 20.2927,0 | 8 | 99  |
| Glucoheptonic acid 3                    | 518 | 344           | 20.3157,0 | 7 | 211 |
| Analyte 519                             | 519 | 247.3333<br>3 | 20.3209,0 | 6 | 267 |
| cis-Phytol                              | 520 | 376.3333<br>3 | 20.3513,0 | 3 | 87  |
| Analyte 521                             | 521 | 301.2         | 20.3563,0 | 8 | 86  |
| unknown                                 | 522 | 338.8         | 20.4563,0 | 8 | 103 |
| heptadecanoic acid                      | 523 | 849.125       | 20.475,0  | 8 | 117 |
| Analyte 524                             | 524 | 225.3333<br>3 | 20.5056,0 | 6 | 85  |
| d-Glucoheptose 2                        | 525 | 303.5         | 20.5168,0 | 8 | 299 |
| Octadecanol                             | 526 | 422.625       | 20.58,0   | 8 | 69  |
| Analyte 527                             | 527 | 283.4285<br>7 | 20.5857,0 | 8 | 71  |
| noradrenaline                           | 528 | 385.5         | 20.6327,0 | 5 | 174 |
| Analyte 529                             | 529 | 289.75        | 20.6478,0 | 8 | 217 |
| Phytol                                  | 530 | 291.375       | 20.6767,0 | 8 | 85  |
| Indolelactate 1                         | 531 | 243           | 20.7307,0 | 4 | 73  |
| unknown                                 | 532 | 305.25        | 20.8033,0 | 6 | 424 |
| Analyte 533                             | 533 | 409           | 20.8017,0 | 4 | 71  |
| unknown                                 | 534 | 506.625       | 20.83,0   | 8 | 103 |
| unknown                                 | 535 | 478.625       | 20.8693,0 | 8 | 283 |
| Analyte 536                             | 536 | 328           | 20.9456,0 | 3 | 80  |
| Fructose 2,6-biphosphate<br>degr prod 2 | 537 | 677.375       | 21.0205,0 | 8 | 73  |
| unknown                                 | 538 | 291           | 21.046,0  | 8 | 203 |
| tryptophan 2                            | 539 | 319.125       | 21.088,0  | 8 | 314 |
| 5-Hydroxyindole-3-acetic<br>acid 1      | 540 | 339.75        | 21.1148,0 | 8 | 219 |
| Elaidic acid                            | 541 | 937.125       | 21.1358,0 | 8 | 117 |
| unknown                                 | 542 | 516.4         | 21.1407,0 | 5 | 211 |
| linoleic acid                           | 544 | 414           | 21.1949,0 | 3 | 179 |
| oleic acid                              | 545 | 521           | 21.2863,0 | 5 | 117 |
| unknown                                 | 546 | 444.8         | 21.2888,0 | 8 | 131 |
| Analyte 547                             | 547 | 340           | 21.2963,0 | 8 | 71  |
| stearic acid                            | 548 | 968.5         | 21.3727,0 | 8 | 117 |
| pyridoxal phosphate 1                   | 549 | 322.75        | 21.4067,0 | 8 | 369 |
| unknown                                 | 550 | 264           | 21.4812,0 | 7 | 174 |
| Analyte 551                             | 551 | 251           | 21.4961,0 | 7 | 57  |
| Analyte 552                             | 552 | 329.3333<br>3 | 21.5115,0 | 8 | 131 |
| indole-3-acetamide 4                    | 553 | 363.75        | 21.5603,0 | 4 | 221 |

|                                    |     |               |           |   |     |
|------------------------------------|-----|---------------|-----------|---|-----|
| Analyte 554                        | 554 | 340           | 21.6054,0 | 7 | 309 |
| Analyte 555                        | 555 | 350.25        | 21.7094,0 | 7 | 73  |
| fructose-6-phosphate               | 556 | 491.5         | 21.785,0  | 4 | 217 |
| unknown                            | 557 | 383.5         | 21.82,0   | 8 | 125 |
| Analyte 558                        | 558 | 287           | 21.8463,0 | 8 | 57  |
| unknown                            | 559 | 471.5         | 21.9073,0 | 3 | 167 |
| unknown                            | 560 | 305.75        | 21.9482,0 | 8 | 101 |
| Phenyl beta-D-<br>glucopyranoside  | 561 | 447.7142<br>9 | 21.9832,0 | 8 | 361 |
| unknown                            | 562 | 359.25        | 22.0085,0 | 8 | 315 |
| unknown                            | 563 | 464.5         | 22.039,0  | 8 | 217 |
| Analyte 564                        | 564 | 258.5         | 22.076,0  | 6 | 98  |
| Analyte 565                        | 565 | 0             | 22.0938,0 | 7 | 186 |
| Analyte 566                        | 566 | 0             | 22.1112,0 | 8 | 103 |
| Analyte 567                        | 567 | 0             | 22.118,0  | 5 | 457 |
| glucose-6-phosphate 2              | 569 | 530.25        | 22.1847,0 | 8 | 73  |
| unknown                            | 570 | 356           | 22.196,0  | 8 | 187 |
| Analyte 571                        | 571 | 0             | 22.2617,0 | 8 | 217 |
| Analyte 572                        | 572 | 0             | 22.2909,0 | 3 | 85  |
| Analyte 573                        | 573 | 0             | 22.294,0  | 3 | 85  |
| Analyte 574                        | 574 | 191           | 22.4082,0 | 8 | 71  |
| arachidonic acid                   | 575 | 768.5         | 22.4275,0 | 8 | 80  |
| Purine riboside                    | 576 | 502           | 22.475,0  | 8 | 73  |
| unknown                            | 577 | 439.2         | 22.4818,0 | 8 | 71  |
| unknown                            | 578 | 212.6666<br>7 | 22.5167,0 | 7 | 258 |
| Analyte 579                        | 579 | 287           | 22.5278,0 | 3 | 198 |
| unknown                            | 580 | 367           | 22.5424,0 | 7 | 57  |
| unknown                            | 581 | 206           | 22.5522,0 | 3 | 126 |
| Analyte 582                        | 582 | 233.3333<br>3 | 22.5853,0 | 8 | 159 |
| Analyte 583                        | 583 | 0             | 22.6365,0 | 8 | 217 |
| unknown                            | 584 | 465.5         | 22.7024,0 | 3 | 160 |
| 6-phosphogluconic acid             | 585 | 721.25        | 22.7112,0 | 8 | 318 |
| N-Acetyl-5-<br>hydroxytryptamine 1 | 586 | 437.5714<br>3 | 22.7683,0 | 7 | 290 |
| cytidine-5'-monophosphate          | 587 | 394.2857<br>1 | 22.7826,0 | 7 | 256 |
| Dehydroabiatic Acid                | 588 | 285.25        | 22.797,0  | 4 | 240 |
| unknown                            | 589 | 522.375       | 22.8112,0 | 8 | 131 |
| unknown                            | 590 | 317.5         | 22.8224,0 | 3 | 218 |
| cis-gondoic acid                   | 591 | 682.125       | 22.8672,0 | 8 | 129 |
| Analyte 592                        | 592 | 196.5         | 22.949,0  | 8 | 175 |



|                                     |     |               |           |   |     |
|-------------------------------------|-----|---------------|-----------|---|-----|
| uridine 2                           | 593 | 834.4285<br>7 | 23.0049,0 | 7 | 258 |
| Arachidic acid                      | 594 | 666.75        | 23.0122,0 | 8 | 117 |
| Analyte 595                         | 595 | 294.75        | 23.0253,0 | 8 | 131 |
| unknown                             | 596 | 531.125       | 23.0568,0 | 8 | 285 |
| cytidine-monophosphate degr<br>prod | 597 | 357.2857<br>1 | 23.0722,0 | 8 | 387 |
| D-erythro-sphingosine 1             | 598 | 700.4285<br>7 | 23.1233,0 | 7 | 204 |
| unknown                             | 599 | 506.25        | 23.1767,0 | 8 | 73  |
| saccharopine 3                      | 600 | 284           | 23.2182,0 | 8 | 358 |
| Analyte 601                         | 601 | 454           | 23.2388,0 | 8 | 73  |
| unknown                             | 602 | 314           | 23.2463,0 | 8 | 301 |
| Analyte 603                         | 603 | 0             | 23.2629,0 | 3 | 250 |
| DL-dihydrosphingosine 1             | 604 | 447.5         | 23.3167,0 | 8 | 205 |
| Neohesperidin                       | 605 | 547.625       | 23.4368,0 | 8 | 217 |
| Analyte 606                         | 606 | 0             | 23.4995,0 | 8 | 55  |
| Analyte 607                         | 607 | 284           | 23.5302,0 | 8 | 131 |
| Analyte 608                         | 608 | 176           | 23.5529,0 | 7 | 227 |
| piceatannol 2                       | 609 | 424.6666<br>7 | 23.5789,0 | 3 | 430 |
| Analyte 610                         | 610 | 0             | 23.6264,0 | 3 | 204 |
| unknown                             | 611 | 202.5         | 23.6935,0 | 8 | 181 |
| unknown                             | 612 | 329.25        | 23.728,0  | 8 | 301 |
| Analyte 613                         | 613 | 0             | 23.7605,0 | 8 | 387 |
| Dioctyl phthalate                   | 614 | 940.625       | 23.7848,0 | 8 | 149 |
| Analyte 615                         | 615 | 219           | 23.822,0  | 8 | 85  |
| Analyte 616                         | 616 | 288.6666<br>7 | 23.8293,0 | 8 | 209 |
| unknown                             | 617 | 496.75        | 23.8563,0 | 4 | 387 |
| 2-Monopalmitin                      | 618 | 690.125       | 23.8627,0 | 8 | 217 |
| androsterone 1                      | 619 | 513           | 23.9353,0 | 8 | 91  |
| unknown                             | 620 | 419.5         | 24.003,0  | 4 | 79  |
| inosine                             | 621 | 945.5         | 23.9985,0 | 8 | 73  |
| Analyte 622                         | 622 | 453.5         | 24.0678,0 | 3 | 79  |
| unknown                             | 623 | 494.6666<br>7 | 24.07,0   | 6 | 79  |
| 1-Monopalmitin                      | 624 | 846.25        | 24.1193,0 | 8 | 371 |
| Analyte 625                         | 625 | 250           | 24.138,0  | 8 | 85  |
| unknown                             | 626 | 378.8333<br>3 | 24.1978,0 | 7 | 370 |
| unknown                             | 627 | 325.4         | 24.2052,0 | 8 | 159 |
| Analyte 628                         | 628 | 312           | 24.238,0  | 7 | 259 |
| Analyte 629                         | 629 | 228.5         | 24.2622,0 | 7 | 85  |

|                                       |     |                |            |   |     |
|---------------------------------------|-----|----------------|------------|---|-----|
| Analyte 630                           | 630 | 0              | 24. 3443,0 | 8 | 73  |
| Analyte 631                           | 631 | 330.8          | 24. 3613,0 | 8 | 259 |
| sucrose                               | 632 | 630. 375       | 24. 4205,0 | 8 | 361 |
| unknown                               | 633 | 350            | 24. 43,0   | 8 | 58  |
| adenosine                             | 634 | 903. 625       | 24. 4718,0 | 8 | 236 |
| Behenic acid                          | 635 | 649. 375       | 24. 5438,0 | 8 | 117 |
| unknown                               | 636 | 282. 3333<br>3 | 24. 6478,0 | 3 | 259 |
| xanthosine                            | 637 | 874            | 24. 7363,0 | 4 | 325 |
| lactose 2                             | 638 | 946. 625       | 24. 8043,0 | 8 | 204 |
| lactose 2                             | 639 | 920. 25        | 24. 9325,0 | 8 | 204 |
| unknown                               | 640 | 259            | 25. 0562,0 | 8 | 172 |
| 11-beta-prostaglandin-F-2-<br>alpha 1 | 641 | 413. 6666<br>7 | 25. 1136,0 | 3 | 103 |
| Analyte 642                           | 642 | 227            | 25. 1417,0 | 4 | 358 |
| 2-Monoolein                           | 643 | 510. 5         | 25. 1713,0 | 8 | 103 |
| Monoolein                             | 644 | 387. 5714<br>3 | 25. 2849,0 | 7 | 129 |
| unknown                               | 645 | 423. 5         | 25. 3087,0 | 4 | 204 |
| Lactobionic Acid 1                    | 646 | 588. 625       | 25. 3748,0 | 8 | 73  |
| Prostaglandin E2 2                    | 647 | 319. 625       | 25. 3823,0 | 8 | 169 |
| guanosine                             | 648 | 901. 25        | 25. 4443,0 | 8 | 324 |
| Monostearin                           | 649 | 844. 75        | 25. 5402,0 | 8 | 399 |
| 2'-deoxyguanosine 1                   | 650 | 512. 4         | 25. 5484,0 | 5 | 280 |
| chrysin                               | 651 | 268            | 25. 6042,0 | 3 | 398 |
| Gentiobiose 1                         | 652 | 482. 3333<br>3 | 25. 6113,0 | 6 | 204 |
| unknown                               | 653 | 363. 6666<br>7 | 25. 6229,0 | 3 | 257 |
| 5'-methylthioadenosine 1              | 654 | 769. 25        | 25. 6295,0 | 8 | 236 |
| kyotorphin 4                          | 655 | 314. 8571<br>4 | 25. 6705,0 | 8 | 71  |
| unknown                               | 656 | 305            | 25. 7511,0 | 6 | 221 |
| Palatinose                            | 657 | 414. 8571<br>4 | 25. 8625,0 | 8 | 169 |
| Analyte 658                           | 658 | 296. 7142<br>9 | 25. 8862,0 | 8 | 144 |
| Lignoceric acid                       | 659 | 758            | 25. 975,0  | 8 | 117 |
| Uridine monophosphate                 | 660 | 445. 8571<br>4 | 26. 0775,0 | 8 | 352 |
| unknown                               | 661 | 331. 25        | 26. 1013,0 | 4 | 124 |
| Digalacturonic acid 2                 | 662 | 258. 3333<br>3 | 26. 1313,0 | 6 | 169 |
| Analyte 663                           | 663 | 159. 5         | 26. 2531,0 | 3 | 243 |

|                                                 |     |               |           |   |     |
|-------------------------------------------------|-----|---------------|-----------|---|-----|
| 6-hydroxy caproic acid trimer                   | 664 | 226.4285<br>7 | 26.3778,0 | 7 | 155 |
| 4-Androsten-19-ol-3,17-dione 2                  | 665 | 329.6666<br>7 | 26.4824,0 | 6 | 73  |
| 5,7-dihydroxy-3-(4-methoxyphenyl) chromen-4-one | 666 | 303           | 26.4889,0 | 6 | 243 |
| unknown                                         | 667 | 369           | 26.5921,0 | 7 | 105 |
| 4',5-dihydroxy-7-methoxyisoflavone              | 668 | 317           | 26.6936,0 | 3 | 155 |
| Analyte 669                                     | 669 | 0             | 26.8108,0 | 8 | 204 |
| unknown                                         | 670 | 406.1428<br>6 | 26.8929,0 | 7 | 204 |
| inosine 5'-monophosphate                        | 671 | 720.7142<br>9 | 26.9569,0 | 7 | 169 |
| Galactinol 1                                    | 672 | 445           | 27.0355,0 | 8 | 73  |
| unknown                                         | 673 | 237           | 27.0749,0 | 6 | 364 |
| unknown                                         | 674 | 239           | 27.166,0  | 3 | 227 |
| Cerotic acid                                    | 675 | 438.5         | 27.2167,0 | 3 | 117 |
| 4-Androsten-11beta-ol-3,17-dione 2              | 676 | 348.8         | 27.3068,0 | 8 | 299 |
| Hesperitin 2                                    | 677 | 370.75        | 27.3353,0 | 4 | 117 |
| Analyte 678                                     | 678 | 293.25        | 27.3518,0 | 8 | 58  |
| Adenosine 5-monophosphate                       | 679 | 950.875       | 27.4972,0 | 8 | 169 |
| Analyte 680                                     | 680 | 188.5         | 27.8087,0 | 3 | 155 |
| Tetrahydrocorticosterone 1                      | 681 | 338           | 27.8931,0 | 3 | 204 |
| Cyclic AMP                                      | 682 | 331.4         | 27.9142,0 | 8 | 169 |
| Analyte 683                                     | 683 | 310           | 28.0912,0 | 8 | 119 |
| 5-Dihydrocortisone 1                            | 684 | 293.3333<br>3 | 28.202,0  | 3 | 237 |
| 5-Dihydrocortisol 2                             | 685 | 486.3333<br>3 | 28.2955,0 | 8 | 207 |
| 3,7,12-Trihydroxycoprostanol 1                  | 686 | 610.75        | 28.421,0  | 8 | 368 |
| unknown                                         | 687 | 580           | 28.4319,0 | 5 | 64  |
| Cortexolone 4                                   | 688 | 201           | 28.4517,0 | 7 | 306 |
| unknown                                         | 689 | 430.375       | 28.5193,0 | 8 | 223 |
| unknown                                         | 690 | 368.25        | 28.6508,0 | 8 | 351 |
| cholesterol                                     | 691 | 473.2         | 28.81,0   | 5 | 255 |
| Analyte 692                                     | 692 | 383.5         | 28.9001,0 | 7 | 133 |
| Analyte 693                                     | 693 | 352           | 29.1313,0 | 3 | 259 |
| Aldosterone 2                                   | 694 | 299.4         | 29.3313,0 | 6 | 309 |
| unknown                                         | 695 | 359.75        | 30.559,0  | 4 | 74  |
| Cholestane-3,5,6-triol, (3beta,5alpha,6beta)-   | 696 | 454.625       | 30.5523,0 | 8 | 57  |

|             |     |     |           |   |     |
|-------------|-----|-----|-----------|---|-----|
| Analyte 697 | 697 | 0   | 31.903,0  | 8 | 311 |
| Analyte 698 | 698 | 264 | 31.914,0  | 6 | 283 |
| Analyte 699 | 699 | 0   | 32.8107,0 | 4 | 57  |
| Analyte 700 | 700 | 0   | 32.91,0   | 8 | 316 |
| Analyte 701 | 701 | 0   | 33.3765,0 | 8 | 297 |

## Additional file 2

| Peak                                 | MEAN<br>Con | MEAN<br>Tre | P-VALUE     | FOLD<br>CHANGE |
|--------------------------------------|-------------|-------------|-------------|----------------|
| valine                               | 0.369325497 | 0.220223264 | 0.000336889 | 1.677050328    |
| palmitic acid                        | 1.239281923 | 1.043496301 | 0.007490921 | 1.187624645    |
| stearic acid                         | 0.913042055 | 0.744723723 | 0.003644442 | 1.226014463    |
| succinic acid                        | 0.221966843 | 0.143498246 | 0.031936129 | 1.546826176    |
| Adenosine 5-monophosphate            | 0.028628158 | 0.046667612 | 0.002532634 | 0.613448108    |
| Isoleucine                           | 0.49326147  | 0.317411654 | 0.008124654 | 1.554011843    |
| inosine                              | 0.742582504 | 0.367227755 | 0.008877922 | 2.022130665    |
| proline                              | 2.081846849 | 1.65292906  | 0.011261625 | 1.259489533    |
| Myristic Acid                        | 0.024563298 | 0.018152603 | 0.008377767 | 1.353155733    |
| hypoxanthine 1                       | 0.304971229 | 0.164277902 | 0.009031754 | 1.856434894    |
| oxoproline                           | 0.646299289 | 0.77865743  | 0.004937477 | 0.830017495    |
| aspartic acid 1                      | 0.986074378 | 1.287650168 | 0.002040026 | 0.765793693    |
| guanosine                            | 0.011824069 | 0.005406654 | 0.008312602 | 2.186947592    |
| 4-hydroxybutyrate                    | 0.023066458 | 0.010145873 | 0.000207025 | 2.273481907    |
| xanthosine                           | 0.001043318 | 3.40964E-06 | 5.14527E-05 | 305.9907382    |
| aspartic acid 2                      | 0.014003142 | 0.023421349 | 2.47226E-05 | 0.597879392    |
| guanine 1                            | 0.029680987 | 0.012426496 | 0.002821051 | 2.388524238    |
| 1-Monopalmitin                       | 0.001745563 | 0.001367033 | 0.018691885 | 1.276899289    |
| uridine 2                            | 0.002891198 | 0.001088588 | 0.008910189 | 2.655915141    |
| trans-4-hydroxy-L-proline 2          | 0.008693277 | 0.010350678 | 0.024521811 | 0.839875132    |
| proline                              | 0.011500824 | 3.40964E-06 | 0.013185429 | 3373.032907    |
| unknown                              | 0.510718222 | 0.388521089 | 0.002643777 | 1.314518662    |
| Galactonic acid                      | 0.008026139 | 0.005221658 | 0.002650469 | 1.537086338    |
| lauric acid                          | 0.008967564 | 0.006131032 | 0.003370249 | 1.462651599    |
| thymine                              | 0.002641439 | 0.000835765 | 5.95135E-06 | 3.160504119    |
| xylitol                              | 0.003322532 | 0.002672077 | 0.04540297  | 1.243426972    |
| 1-Hexadecanol                        | 0.00531801  | 0.002905336 | 0.004169676 | 1.830428242    |
| Lignoceric acid                      | 0.002590111 | 0.002052197 | 0.002508209 | 1.262116087    |
| N-Methyl-DL-alanine                  | 0.002191283 | 0.002713891 | 0.006603959 | 0.807431891    |
| 2-Monopalmitin                       | 0.001731696 | 0.0009624   | 0.004664126 | 1.799351269    |
| conduritol b epoxide 2               | 0.000238354 | 0.001597938 | 0.014603781 | 0.149163719    |
| O-Phosphoserine 1                    | 0.000900705 | 0.000739981 | 0.040464731 | 1.217200332    |
| Fructose 2,6-biphosphate degr prod 2 | 1.540548713 | 1.253744623 | 0.019802823 | 1.228757981    |
| 3-hydroxybutyric acid                | 0.001622782 | 0.000828426 | 0.000325965 | 1.958873232    |
| methionine 1                         | 0.114464002 | 0.089876199 | 0.020614982 | 1.273574126    |
| Arachidic acid                       | 0.005833637 | 0.003821058 | 0.001523793 | 1.526707287    |
| Behenic acid                         | 0.001211306 | 0.000878552 | 0.001530522 | 1.378751725    |
| Glucose-1-phosphate                  | 0.004867377 | 0.01604672  | 0.038848916 | 0.303325342    |
| sulfuric acid                        | 0.137668442 | 0.105932379 | 0.005251651 | 1.299587929    |

|                                                    |             |             |             |             |
|----------------------------------------------------|-------------|-------------|-------------|-------------|
| 4-Hydroxybenzoic acid                              | 0.000526125 | 9.13539E-05 | 0.007994658 | 5.759198427 |
| oxalic acid                                        | 1.095132741 | 0.849325655 | 0.026662131 | 1.289414413 |
| unknown                                            | 0.003729364 | 0.004863945 | 0.000553575 | 0.766736531 |
| malonic acid 1                                     | 0.052570613 | 0.045506958 | 0.045174078 | 1.155221424 |
| unknown                                            | 0.005389438 | 0.004252564 | 0.000749772 | 1.267338692 |
| glucose-6-phosphate 2                              | 0.024173675 | 0.019016678 | 0.021608173 | 1.271182854 |
| unknown                                            | 0.00876873  | 0.007734984 | 0.032587583 | 1.133645597 |
| unknown                                            | 0.001753127 | 0.000734541 | 0.03163579  | 2.38669881  |
| androsterone 1                                     | 0.001243052 | 0.001707537 | 0.023126575 | 0.727979385 |
| 2'-deoxyguanosine 1                                | 0.000607918 | 3.67287E-05 | 0.001977663 | 16.55158296 |
| unknown                                            | 0.005793985 | 0.004216396 | 0.00831953  | 1.374155794 |
| Analyte 301                                        | 0.00490426  | 0.003727196 | 0.003787964 | 1.315804126 |
| D-erythronolactone 2                               | 0.002948893 | 0.001771553 | 0.023960844 | 1.664581035 |
| 2-hydroxy-3-isopropylbutanedioic acid              | 0.011428845 | 0.008050866 | 0.005387072 | 1.419579649 |
| unknown                                            | 0.031308125 | 0.021977865 | 0.003312095 | 1.424529862 |
| unknown                                            | 0.00333456  | 0.001738475 | 0.000557817 | 1.91809465  |
| Cholestane-3,5,6-triol,<br>(3beta ,5alpha ,6beta)- | 0.481810421 | 0.378454678 | 0.04016568  | 1.273099393 |
| DL-dihydrosphingosine 1                            | 0.001726977 | 0.000705689 | 0.000110798 | 2.447219323 |
| Uridine monophosphate                              | 0.000787753 | 0.000469951 | 0.016401311 | 1.676245505 |
| Galactinol 1                                       | 0.008991143 | 0.004490344 | 0.003070276 | 2.00232816  |
| Analyte 79                                         | 1.303814315 | 0.864123952 | 0.003572682 | 1.508827885 |
| unknown                                            | 0.182560354 | 0.126160626 | 0.025850471 | 1.447046983 |
| unknown                                            | 0.000375335 | 0.000297591 | 0.016764277 | 1.261242033 |
| unknown                                            | 0.002828312 | 0.001418995 | 0.007196396 | 1.993180657 |
| unknown                                            | 0.016484713 | 0.011998398 | 0.001583241 | 1.373909469 |
| 3-hydroxypyruvate                                  | 0.008941715 | 0.005656244 | 0.006134388 | 1.580857282 |
| unknown                                            | 0.000720625 | 0.000490468 | 0.042302773 | 1.469258699 |
| Analyte 480                                        | 0.000985709 | 0.000620414 | 0.011041863 | 1.588792796 |
| 2-ketobutyric acid 2                               | 0.010612147 | 0.008217586 | 0.016584344 | 1.291394783 |
| Analyte 240                                        | 0.017819426 | 0.021996672 | 0.012245191 | 0.810096483 |
| S-carboxymethylcysteine 2                          | 0.001348382 | 0.001017267 | 0.03415285  | 1.325494775 |
| Analyte 595                                        | 0.012591482 | 0.009361226 | 0.000577103 | 1.345067565 |
| Phytol                                             | 0.009709696 | 0.008720129 | 0.007879113 | 1.113480847 |
| Analyte 616                                        | 0.001284969 | 0.000527702 | 6.97979E-05 | 2.43502954  |
| unknown                                            | 0.008330113 | 0.005287983 | 0.003211802 | 1.575291105 |
| saccharopine 3                                     | 0.001405165 | 0.000825443 | 0.003425803 | 1.702317551 |
| Analyte 625                                        | 0.006616135 | 0.00571412  | 0.03792114  | 1.157857305 |
| unknown                                            | 0.003063457 | 0.002716893 | 0.010865241 | 1.127558832 |
| Glucosaminic acid                                  | 0.000752194 | 0.000302321 | 0.004957223 | 2.488069123 |
| Analyte 250                                        | 0.001531887 | 0.00095379  | 0.004759153 | 1.606105238 |
| uracil                                             | 0.014438662 | 0.013845299 | 0.006136563 | 1.04285668  |

|                      |             |             |             |             |
|----------------------|-------------|-------------|-------------|-------------|
| N-Acetyl-L-leucine 3 | 0.000394189 | 6.18154E-05 | 0.012079341 | 6.376870043 |
| Analyte 524          | 0.002304071 | 0.000498981 | 0.034976682 | 4.617553638 |
| Analyte 304          | 0.010182126 | 0.008959021 | 0.028691072 | 1.136522199 |
| unknown              | 0.002027679 | 0.00183032  | 0.015453851 | 1.107827431 |
| Analyte 592          | 0.000635322 | 0.000346482 | 0.000173439 | 1.83363748  |
| Analyte 354          | 0.000331754 | 9.05752E-05 | 0.04611047  | 3.662744791 |
| Analyte 91           | 0.00029647  | 0.000255821 | 0.049516556 | 1.158893517 |
| Analyte 238          | 0.000728523 | 0.000600767 | 0.010052642 | 1.212654552 |
| Analyte 1            | 0.001362711 | 0.000904119 | 0.014481464 | 1.507225957 |
| Analyte 23           | 0.000656692 | 0.000505863 | 0.017388838 | 1.298161337 |
| Analyte 26           | 0.168076021 | 0.105716352 | 0.045501798 | 1.589877228 |
| Analyte 27           | 0.008739285 | 0.007811395 | 0.049552315 | 1.118786638 |
| Analyte 39           | 0.013341881 | 0.011207508 | 0.000240954 | 1.190441398 |
| Analyte 42           | 0.015095896 | 0.009887113 | 0.000420935 | 1.526825453 |
| Analyte 64           | 0.00098803  | 0.000340764 | 0.014881838 | 2.899457682 |
| Analyte 80           | 0.09006416  | 0.05140259  | 0.040392618 | 1.752132713 |
| Analyte 104          | 0.001932992 | 0.002273872 | 0.001215609 | 0.850088496 |
| Analyte 131          | 0.003590948 | 0.003343744 | 0.028631645 | 1.073930231 |
| Analyte 210          | 0.137067126 | 0.053781401 | 0.000266203 | 2.548597147 |
| Analyte 566          | 0.004866846 | 0.002077234 | 0.002583743 | 2.342945133 |
| Analyte 571          | 0.000717172 | 0.000428397 | 0.00056751  | 1.674084496 |
| Analyte 583          | 0.068168642 | 0.027880441 | 0.00189658  | 2.445034595 |
| Analyte 669          | 0.000812562 | 0.001015656 | 0.013880406 | 0.800036397 |
| Analyte 697          | 0.004890187 | 0.004088506 | 0.002500251 | 1.196081735 |
| Analyte 701          | 0.002304669 | 0.001923295 | 0.009872867 | 1.19829204  |

## Additional file 3

| Pathway  | Description                                                        | # compounds (dem) | # compounds (all) |
|----------|--------------------------------------------------------------------|-------------------|-------------------|
| hsa01100 | Metabolic pathways - Homo sapiens (human)                          | 34                | 129               |
| hsa00230 | Purine metabolism - Homo sapiens (human)                           | 8                 | 14                |
| hsa01230 | Biosynthesis of amino acids - Homo sapiens (human)                 | 7                 | 21                |
| hsa02010 | ABC transporters - Homo sapiens (human)                            | 7                 | 25                |
| hsa01200 | Carbon metabolism - Homo sapiens (human)                           | 6                 | 18                |
| hsa05230 | Central carbon metabolism in cancer - Homo sapiens (human)         | 6                 | 15                |
| hsa00970 | Aminoacyl-tRNA biosynthesis - Homo sapiens (human)                 | 5                 | 11                |
| hsa01040 | Biosynthesis of unsaturated fatty acids - Homo sapiens (human)     | 5                 | 8                 |
| hsa00061 | Fatty acid biosynthesis - Homo sapiens (human)                     | 4                 | 7                 |
| hsa00240 | Pyrimidine metabolism - Homo sapiens (human)                       | 4                 | 12                |
| hsa00260 | Glycine, serine and threonine metabolism - Homo sapiens (human)    | 4                 | 12                |
| hsa00270 | Cysteine and methionine metabolism - Homo sapiens (human)          | 4                 | 8                 |
| hsa01210 | 2-Oxocarboxylic acid metabolism - Homo sapiens (human)             | 4                 | 12                |
| hsa04974 | Protein digestion and absorption - Homo sapiens (human)            | 4                 | 11                |
| hsa00290 | Valine, leucine and isoleucine biosynthesis - Homo sapiens (human) | 3                 | 5                 |
| hsa00330 | Arginine and proline metabolism - Homo sapiens (human)             | 3                 | 10                |
| hsa00630 | Glyoxylate and dicarboxylate metabolism - Homo sapiens (human)     | 3                 | 9                 |



|          |                                                                            |   |    |
|----------|----------------------------------------------------------------------------|---|----|
| hsa00650 | Butanoate metabolism - Homo sapiens (human)                                | 3 | 7  |
| hsa00770 | Pantothenate and CoA biosynthesis - Homo sapiens (human)                   | 3 | 6  |
| hsa04978 | Mineral absorption - Homo sapiens (human)                                  | 3 | 9  |
| hsa00030 | Pentose phosphate pathway - Homo sapiens (human)                           | 2 | 5  |
| hsa00071 | Fatty acid degradation - Homo sapiens (human)                              | 2 | 3  |
| hsa00250 | Alanine, aspartate and glutamate metabolism - Homo sapiens (human)         | 2 | 9  |
| hsa00280 | Valine, leucine and isoleucine degradation - Homo sapiens (human)          | 2 | 3  |
| hsa00310 | Lysine degradation - Homo sapiens (human)                                  | 2 | 8  |
| hsa00410 | beta-Alanine metabolism - Homo sapiens (human)                             | 2 | 8  |
| hsa00640 | Propanoate metabolism - Homo sapiens (human)                               | 2 | 6  |
| hsa00760 | Nicotinate and nicotinamide metabolism - Homo sapiens (human)              | 2 | 7  |
| hsa00920 | Sulfur metabolism - Homo sapiens (human)                                   | 2 | 3  |
| hsa04024 | cAMP signaling pathway - Homo sapiens (human)                              | 2 | 7  |
| hsa04922 | Glucagon signaling pathway - Homo sapiens (human)                          | 2 | 8  |
| hsa00020 | Citrate cycle (TCA cycle) - Homo sapiens (human)                           | 1 | 5  |
| hsa00040 | Pentose and glucuronate interconversions - Homo sapiens (human)            | 1 | 9  |
| hsa00051 | Fructose and mannose metabolism - Homo sapiens (human)                     | 1 | 3  |
| hsa00052 | Galactose metabolism - Homo sapiens (human)                                | 1 | 10 |
| hsa00062 | Fatty acid elongation - Homo sapiens (human)                               | 1 | 1  |
| hsa00072 | Synthesis and degradation of ketone bodies - Homo sapiens (human)          | 1 | 1  |
| hsa00130 | Ubiquinone and other terpenoid-quinone biosynthesis - Homo sapiens (human) | 1 | 1  |

|          |                                                                |   |   |
|----------|----------------------------------------------------------------|---|---|
| hsa00140 | Steroid hormone biosynthesis - Homo sapiens (human)            | 1 | 7 |
| hsa00190 | Oxidative phosphorylation - Homo sapiens (human)               | 1 | 4 |
| hsa00220 | Arginine biosynthesis - Homo sapiens (human)                   | 1 | 8 |
| hsa00232 | Caffeine metabolism - Homo sapiens (human)                     | 1 | 1 |
| hsa00340 | Histidine metabolism - Homo sapiens (human)                    | 1 | 2 |
| hsa00350 | Tyrosine metabolism - Homo sapiens (human)                     | 1 | 5 |
| hsa00360 | Phenylalanine metabolism - Homo sapiens (human)                | 1 | 4 |
| hsa00600 | Sphingolipid metabolism - Homo sapiens (human)                 | 1 | 3 |
| hsa00620 | Pyruvate metabolism - Homo sapiens (human)                     | 1 | 3 |
| hsa00790 | Folate biosynthesis - Homo sapiens (human)                     | 1 | 1 |
| hsa01212 | Fatty acid metabolism - Homo sapiens (human)                   | 1 | 1 |
| hsa04071 | Sphingolipid signaling pathway - Homo sapiens (human)          | 1 | 4 |
| hsa04080 | Neuroactive ligand-receptor interaction - Homo sapiens (human) | 1 | 7 |
| hsa04152 | AMPK signaling pathway - Homo sapiens (human)                  | 1 | 2 |
| hsa04727 | GABAergic synapse - Homo sapiens (human)                       | 1 | 5 |

## Additional file 4

| Peak                               | KEGG COMPOUND name               | KEGG Link                                                                                                           |
|------------------------------------|----------------------------------|---------------------------------------------------------------------------------------------------------------------|
| 2-hydroxypyridine                  | 2-Hydroxypyridine                | <a href="http://www.kegg.jp/dbget-bin/www_bget?cpd:C02502">http://www.kegg.jp/dbget-bin/www_bget?cpd:C02502</a>     |
| 2-ketobutyric acid 2               | 2-ketobutyric acid               | <a href="http://www.kegg.jp/dbget-bin/www_bget?cpd:C00109">http://www.kegg.jp/dbget-bin/www_bget?cpd:C00109</a>     |
| lactic acid                        | lactic acid                      | <a href="http://www.kegg.jp/dbget-bin/www_bget?cpd:C01432">http://www.kegg.jp/dbget-bin/www_bget?cpd:C01432</a>     |
| glycolic acid                      | glycolic acid                    | <a href="http://www.kegg.jp/dbget-bin/www_bget?cpd:C00160">http://www.kegg.jp/dbget-bin/www_bget?cpd:C00160</a>     |
| Maleimide                          | Maleimide                        | <a href="http://www.kegg.jp/dbget-bin/www_bget?cpd:C07272">http://www.kegg.jp/dbget-bin/www_bget?cpd:C07272</a>     |
| 2-keto-isovaleric acid 1           | NA                               | NA                                                                                                                  |
| oxalic acid                        | oxalic acid                      | <a href="http://www.kegg.jp/dbget-bin/www_bget?cpd:C00209">http://www.kegg.jp/dbget-bin/www_bget?cpd:C00209</a>     |
| 2-Ketovaleric acid 2               | alpha-Ketovaleric acid           | <a href="http://www.genome.jp/dbget-bin/www_bget?cpd:C06255">http://www.genome.jp/dbget-bin/www_bget?cpd:C06255</a> |
| sarcosine                          | sarcosine                        | <a href="http://www.kegg.jp/dbget-bin/www_bget?cpd:C00213">http://www.kegg.jp/dbget-bin/www_bget?cpd:C00213</a>     |
| 3-Hydroxypropionic acid 1          | 3-Hydroxypropionic acid          | <a href="http://www.kegg.jp/dbget-bin/www_bget?cpd:C01013">http://www.kegg.jp/dbget-bin/www_bget?cpd:C01013</a>     |
| 3-Hydroxypyridine                  | NA                               | NA                                                                                                                  |
| 3-hydroxybutyric acid              | (R)-3-Hydroxybutyric acid        | NA                                                                                                                  |
| sulfuric acid                      | sulfuric acid                    | <a href="http://www.kegg.jp/dbget-bin/www_bget?cpd:C00059">http://www.kegg.jp/dbget-bin/www_bget?cpd:C00059</a>     |
| 2-amino-2-methylpropane-1,3-diol 2 | 2-Amino-2-methyl-1,3-propanediol | <a href="http://www.genome.jp/dbget-bin/www_bget?cpd:C11260">http://www.genome.jp/dbget-bin/www_bget?cpd:C11260</a> |
| N-Methyl-DL-alanine                | NA                               | NA                                                                                                                  |
| Methyl Phosphate                   | NA                               | NA                                                                                                                  |
| beta-Alanine 1                     | beta-Alanine                     | <a href="http://www.kegg.jp/dbget-bin/www_bget?cpd:C00099">http://www.kegg.jp/dbget-bin/www_bget?cpd:C00099</a>     |
| malonic acid 1                     | malonic acid                     | <a href="http://www.kegg.jp/dbget-bin/www_bget?cpd:C00383">http://www.kegg.jp/dbget-bin/www_bget?cpd:C00383</a>     |
| cycloleucine 2                     | cycloleucine                     | <a href="http://www.kegg.jp/dbget-bin/www_bget?cpd:C03969">http://www.kegg.jp/dbget-bin/www_bget?cpd:C03969</a>     |
| 3-Aminoisobutyric acid 2           | 3-Aminoisobutyric acid           | <a href="http://www.kegg.jp/dbget-bin/www_bget?cpd:C05145">http://www.kegg.jp/dbget-bin/www_bget?cpd:C05145</a>     |
| valine                             | valine                           | <a href="http://www.kegg.jp/dbget-bin/www_bget?cpd:C16436">http://www.kegg.jp/dbget-bin/www_bget?cpd:C16436</a>     |
| Methylmalonic acid                 | Methylmalonic acid               | <a href="http://www.kegg.jp/dbget-bin/www_bget?cpd:C02170">http://www.kegg.jp/dbget-bin/www_bget?cpd:C02170</a>     |

|                                |                       |                                                                                                                     |
|--------------------------------|-----------------------|---------------------------------------------------------------------------------------------------------------------|
| Carnitine                      | Carnitine             | <a href="http://www.kegg.jp/dbget-bin/www_bget?cpd:C00487">http://www.kegg.jp/dbget-bin/www_bget?cpd:C00487</a>     |
| 4-hydroxybutyrate              | 4-Hydroxybutyric acid | NA                                                                                                                  |
| 2-Butyne-1,4-diol              | 2-Butyne-1,4-diol     | <a href="http://www.kegg.jp/dbget-bin/www_bget?cpd:C02497">http://www.kegg.jp/dbget-bin/www_bget?cpd:C02497</a>     |
| 2-ketoadipate 3                | NA                    | NA                                                                                                                  |
| Carbobenzyloxy-L-leucine degr1 | NA                    | NA                                                                                                                  |
| Dihydroxyacetone               | Dihydroxyacetone      | <a href="http://www.kegg.jp/dbget-bin/www_bget?cpd:C00184">http://www.kegg.jp/dbget-bin/www_bget?cpd:C00184</a>     |
| benzoic acid                   | benzoic acid          | <a href="http://www.kegg.jp/dbget-bin/www_bget?cpd:C00180">http://www.kegg.jp/dbget-bin/www_bget?cpd:C00180</a>     |
| Ethanolamine                   | Ethanolamine          | <a href="http://www.kegg.jp/dbget-bin/www_bget?cpd:C00189">http://www.kegg.jp/dbget-bin/www_bget?cpd:C00189</a>     |
| glycerol                       | glycerol              | <a href="http://www.kegg.jp/dbget-bin/www_bget?cpd:C00116">http://www.kegg.jp/dbget-bin/www_bget?cpd:C00116</a>     |
| phosphate                      | phosphate             | <a href="http://www.kegg.jp/dbget-bin/www_bget?cpd:C00009">http://www.kegg.jp/dbget-bin/www_bget?cpd:C00009</a>     |
| 2-Deoxyuridine                 | 2-Deoxyuridine        | <a href="http://www.kegg.jp/dbget-bin/www_bget?cpd:C00526">http://www.kegg.jp/dbget-bin/www_bget?cpd:C00526</a>     |
| 3-hydroxypyruvate              | 3-Hydroxypyruvate     | <a href="http://www.kegg.jp/dbget-bin/www_bget?cpd:C00168">http://www.kegg.jp/dbget-bin/www_bget?cpd:C00168</a>     |
| 4-Vinylphenol                  | 4-vinylphenol         | <a href="http://www.genome.jp/dbget-bin/www_bget?cpd:C05627">http://www.genome.jp/dbget-bin/www_bget?cpd:C05627</a> |
| Isoleucine                     | Isoleucine            | <a href="http://www.kegg.jp/dbget-bin/www_bget?cpd:C16434">http://www.kegg.jp/dbget-bin/www_bget?cpd:C16434</a>     |
| L-Allothreonine 2              | L-Allothreonine       | <a href="http://www.kegg.jp/dbget-bin/www_bget?cpd:C05519">http://www.kegg.jp/dbget-bin/www_bget?cpd:C05519</a>     |
| proline                        | proline               | <a href="http://www.kegg.jp/dbget-bin/www_bget?cpd:C16435">http://www.kegg.jp/dbget-bin/www_bget?cpd:C16435</a>     |
| proline                        | proline               | <a href="http://www.kegg.jp/dbget-bin/www_bget?cpd:C16435">http://www.kegg.jp/dbget-bin/www_bget?cpd:C16435</a>     |
| maleic acid                    | maleic acid           | <a href="http://www.genome.jp/dbget-bin/www_bget?cpd:C01384">http://www.genome.jp/dbget-bin/www_bget?cpd:C01384</a> |
| glycine 2                      | glycine               | <a href="http://www.kegg.jp/dbget-bin/www_bget?cpd:C00037">http://www.kegg.jp/dbget-bin/www_bget?cpd:C00037</a>     |
| 1,4-Cyclohexanedione 2         | 1,4-Cyclohexanedione  | <a href="http://www.genome.jp/dbget-bin/www_bget?cpd:C08063">http://www.genome.jp/dbget-bin/www_bget?cpd:C08063</a> |
| 1,3-Cyclohexanedione 2         | 1,3-Cyclohexanedione  | <a href="http://www.genome.jp/dbget-bin/www_bget?cpd:C01066">http://www.genome.jp/dbget-bin/www_bget?cpd:C01066</a> |
| succinic acid                  | succinic acid         | <a href="http://www.kegg.jp/dbget-bin/www_bget?cpd:C00042">http://www.kegg.jp/dbget-bin/www_bget?cpd:C00042</a>     |
| 2,3-Dihydroxypyridine          | NA                    | NA                                                                                                                  |

|                             |                           |                                                                                                                     |
|-----------------------------|---------------------------|---------------------------------------------------------------------------------------------------------------------|
| Bis(2-hydroxypropyl)amine 1 | NA                        | NA                                                                                                                  |
| Norleucine 1                | L-Norleucine              | NA                                                                                                                  |
| Thymol                      | Thymol                    | <a href="http://www.kegg.jp/dbget-bin/www_bget?cpd:C09908">http://www.kegg.jp/dbget-bin/www_bget?cpd:C09908</a>     |
| uracil                      | uracil                    | <a href="http://www.kegg.jp/dbget-bin/www_bget?cpd:C00106">http://www.kegg.jp/dbget-bin/www_bget?cpd:C00106</a>     |
| Citraconic acid 4           | Citraconic acid           | <a href="http://www.kegg.jp/dbget-bin/www_bget?cpd:C02226">http://www.kegg.jp/dbget-bin/www_bget?cpd:C02226</a>     |
| fumaric acid                | fumaric acid              | <a href="http://www.kegg.jp/dbget-bin/www_bget?cpd:C00122">http://www.kegg.jp/dbget-bin/www_bget?cpd:C00122</a>     |
| serine 1                    | serine                    | <a href="http://www.kegg.jp/dbget-bin/www_bget?cpd:C00065">http://www.kegg.jp/dbget-bin/www_bget?cpd:C00065</a>     |
| Pyrrole-2-Carboxylic Acid   | Pyrrole-2-Carboxylic Acid | NA                                                                                                                  |
| 2,3-Dimethylsuccinic acid   | NA                        | NA                                                                                                                  |
| Pelargonic acid             | Pelargonic acid           | <a href="http://www.kegg.jp/dbget-bin/www_bget?cpd:C01601">http://www.kegg.jp/dbget-bin/www_bget?cpd:C01601</a>     |
| 3-Cyanoalanine              | L-3-Cyanoalanine          | NA                                                                                                                  |
| threonine 1                 | L-Threonine               | NA                                                                                                                  |
| N-Acetyl-beta-alanine 2     | N-Acetyl-beta-alanine     | <a href="http://www.kegg.jp/dbget-bin/www_bget?cpd:C01073">http://www.kegg.jp/dbget-bin/www_bget?cpd:C01073</a>     |
| Tartronic acid              | Tartronic acid            | <a href="http://www.genome.jp/dbget-bin/www_bget?cpd:C02287">http://www.genome.jp/dbget-bin/www_bget?cpd:C02287</a> |
| thymine                     | thymine                   | <a href="http://www.kegg.jp/dbget-bin/www_bget?cpd:C00178">http://www.kegg.jp/dbget-bin/www_bget?cpd:C00178</a>     |
| Glutaric Acid               | glutaric acid             | <a href="http://www.kegg.jp/dbget-bin/www_bget?cpd:C00489">http://www.kegg.jp/dbget-bin/www_bget?cpd:C00489</a>     |
| DL-Anabasine 1              | Anabasine                 | NA                                                                                                                  |
| Biuret 3                    | Biuret                    | <a href="http://www.kegg.jp/dbget-bin/www_bget?cpd:C06555">http://www.kegg.jp/dbget-bin/www_bget?cpd:C06555</a>     |
| methyl trans-cinnamate      | NA                        | NA                                                                                                                  |
| aspartic acid 2             | aspartic acid             | <a href="http://www.kegg.jp/dbget-bin/www_bget?cpd:C16433">http://www.kegg.jp/dbget-bin/www_bget?cpd:C16433</a>     |
| beta-Alanine 2              | beta-Alanine              | <a href="http://www.kegg.jp/dbget-bin/www_bget?cpd:C00099">http://www.kegg.jp/dbget-bin/www_bget?cpd:C00099</a>     |
| N-Ethylglycine 1            | N-Ethylglycine            | <a href="http://www.kegg.jp/dbget-bin/www_bget?cpd:C11735">http://www.kegg.jp/dbget-bin/www_bget?cpd:C11735</a>     |
| N-Acetyl-L-leucine 3        | N-Acetyl-L-leucine        | <a href="http://www.genome.jp/dbget-bin/www_bget?cpd:C02710">http://www.genome.jp/dbget-bin/www_bget?cpd:C02710</a> |
| Maleamate 4                 | Maleamate                 | <a href="http://www.kegg.jp/dbget-bin/www_bget?cpd:C01596">http://www.kegg.jp/dbget-bin/www_bget?cpd:C01596</a>     |

|                                       |                           |                                                                                                                     |
|---------------------------------------|---------------------------|---------------------------------------------------------------------------------------------------------------------|
| Erythrose 1                           | D-Erythrose               | NA                                                                                                                  |
| 5-Methylresorcinol                    | 5-Methylresorcinol        | <a href="http://www.kegg.jp/dbget-bin/www_bget?cpd:C00727">http://www.kegg.jp/dbget-bin/www_bget?cpd:C00727</a>     |
| 2,4-diaminobutyric acid 3             | NA                        | NA                                                                                                                  |
| Capric Acid                           | n-Capric acid             | <a href="http://www.genome.jp/dbget-bin/www_bget?cpd:C01571">http://www.genome.jp/dbget-bin/www_bget?cpd:C01571</a> |
| Aminomalonic acid                     | Aminomalonic acid         | <a href="http://www.kegg.jp/dbget-bin/www_bget?cpd:C00872">http://www.kegg.jp/dbget-bin/www_bget?cpd:C00872</a>     |
| L-Malic acid                          | L-Malic acid              | <a href="http://www.kegg.jp/dbget-bin/www_bget?cpd:C00149">http://www.kegg.jp/dbget-bin/www_bget?cpd:C00149</a>     |
| Ethyl cinnamate                       | Ethyl cinnamate           | NA                                                                                                                  |
| nicotinamide                          | nicotinamide              | NA                                                                                                                  |
| Threitol                              | NA                        | NA                                                                                                                  |
| asparagine 4                          | L-Asparagine              | <a href="http://www.kegg.jp/dbget-bin/www_bget?cpd:C16438">http://www.kegg.jp/dbget-bin/www_bget?cpd:C16438</a>     |
| methionine 1                          | methionine                | <a href="http://www.kegg.jp/dbget-bin/www_bget?cpd:C00073">http://www.kegg.jp/dbget-bin/www_bget?cpd:C00073</a>     |
| aspartic acid 1                       | aspartic acid             | <a href="http://www.kegg.jp/dbget-bin/www_bget?cpd:C16433">http://www.kegg.jp/dbget-bin/www_bget?cpd:C16433</a>     |
| trans-4-hydroxy-L-proline 2           | trans-4-hydroxy-L-proline | <a href="http://www.kegg.jp/dbget-bin/www_bget?cpd:C01157">http://www.kegg.jp/dbget-bin/www_bget?cpd:C01157</a>     |
| oxoproline                            | 4-Oxoproline              | NA                                                                                                                  |
| oxoproline                            | 4-Oxoproline              | NA                                                                                                                  |
| 4-aminobutyric acid 1                 | 4-aminobutyric acid       | <a href="http://www.kegg.jp/dbget-bin/www_bget?cpd:C00334">http://www.kegg.jp/dbget-bin/www_bget?cpd:C00334</a>     |
| L-glutamic acid                       | L-Glutamic acid           | <a href="http://www.genome.jp/dbget-bin/www_bget?cpd:C00025">http://www.genome.jp/dbget-bin/www_bget?cpd:C00025</a> |
| glutamine 3                           | glutamine                 | <a href="http://www.kegg.jp/dbget-bin/www_bget?cpd:C00303">http://www.kegg.jp/dbget-bin/www_bget?cpd:C00303</a>     |
| 2-Amino-2-norbornanecarboxylic acid 1 | NA                        | NA                                                                                                                  |
| L-cysteine                            | L-cysteine                | <a href="http://www.kegg.jp/dbget-bin/www_bget?cpd:C00097">http://www.kegg.jp/dbget-bin/www_bget?cpd:C00097</a>     |
| Threonic acid                         | NA                        | NA                                                                                                                  |
| Dodecanol                             | 1-Dodecanol               | NA                                                                                                                  |
| 2-hydroxy-3-isopropylbutanedioic acid | NA                        | NA                                                                                                                  |
| alpha-ketoglutaric acid               | alpha-ketoglutaric acid   | <a href="http://www.kegg.jp/dbget-bin/www_bget?cpd:C00026">http://www.kegg.jp/dbget-bin/www_bget?cpd:C00026</a>     |
| creatine                              | creatine                  | <a href="http://www.kegg.jp/dbget-bin/www_bget?cpd:C00300">http://www.kegg.jp/dbget-bin/www_bget?cpd:C00300</a>     |

|                                 |                                 |                                                                                                                     |
|---------------------------------|---------------------------------|---------------------------------------------------------------------------------------------------------------------|
| N(epsilon)-Trimethyllysine      | NA                              | NA                                                                                                                  |
| glycocyanine 1                  | glycocyanine                    | <a href="http://www.kegg.jp/dbget-bin/www_bget?cpd:C00581">http://www.kegg.jp/dbget-bin/www_bget?cpd:C00581</a>     |
| 3-hydroxy-3-methylglutaric acid | 3-Hydroxy-3-methylglutaric acid | <a href="http://www.genome.jp/dbget-bin/www_bget?cpd:C03761">http://www.genome.jp/dbget-bin/www_bget?cpd:C03761</a> |
| threo-beta-hydroxyaspartate 2   | NA                              | NA                                                                                                                  |
| Tropic Acid                     | Tropic Acid                     | <a href="http://www.kegg.jp/dbget-bin/www_bget?cpd:C01456">http://www.kegg.jp/dbget-bin/www_bget?cpd:C01456</a>     |
| Phenylphosphoric acid           | Phenolic phosphate              | <a href="http://www.genome.jp/dbget-bin/www_bget?cpd:C02734">http://www.genome.jp/dbget-bin/www_bget?cpd:C02734</a> |
| D-erythronolactone 2            | NA                              | NA                                                                                                                  |
| Digitoxose 2                    | D-Digitoxose                    | NA                                                                                                                  |
| hexadecane                      | 1,2-Epoxyhexadecane             | NA                                                                                                                  |
| glutamic acid                   | D-Glutamic acid                 | NA                                                                                                                  |
| thymidine 2                     | thymidine                       | <a href="http://www.kegg.jp/dbget-bin/www_bget?cpd:C00214">http://www.kegg.jp/dbget-bin/www_bget?cpd:C00214</a>     |
| toluenesulfonic acid            | Toluene-4-sulfonate             | <a href="http://www.genome.jp/dbget-bin/www_bget?cpd:C06677">http://www.genome.jp/dbget-bin/www_bget?cpd:C06677</a> |
| 4-Hydroxybenzoic acid           | 4-Hydroxybenzoic acid           | <a href="http://www.kegg.jp/dbget-bin/www_bget?cpd:C00156">http://www.kegg.jp/dbget-bin/www_bget?cpd:C00156</a>     |
| Cytosin                         |                                 |                                                                                                                     |
| 4-hydroxyphenylacetic acid      | 4-hydroxyphenylacetic acid      | <a href="http://www.kegg.jp/dbget-bin/www_bget?cpd:C00642">http://www.kegg.jp/dbget-bin/www_bget?cpd:C00642</a>     |
| Fluorene                        | Fluorene                        | <a href="http://www.genome.jp/dbget-bin/www_bget?cpd:C07715">http://www.genome.jp/dbget-bin/www_bget?cpd:C07715</a> |
| Lyxose 1                        | D-Lyxose                        | NA                                                                                                                  |
| lauric acid                     | lauric acid                     | <a href="http://www.kegg.jp/dbget-bin/www_bget?cpd:C02679">http://www.kegg.jp/dbget-bin/www_bget?cpd:C02679</a>     |
| pyrophosphate 3                 | pyrophosphate                   | <a href="http://www.kegg.jp/dbget-bin/www_bget?cpd:C00013">http://www.kegg.jp/dbget-bin/www_bget?cpd:C00013</a>     |
| N-acetyl-L-aspartic acid 1      | N-Acetyl-L-aspartic acid        | <a href="http://www.genome.jp/dbget-bin/www_bget?cpd:C01042">http://www.genome.jp/dbget-bin/www_bget?cpd:C01042</a> |
| 1,3-diaminopropane              | 1,3-diaminopropane              | <a href="http://www.kegg.jp/dbget-bin/www_bget?cpd:C00986">http://www.kegg.jp/dbget-bin/www_bget?cpd:C00986</a>     |
| asparagine 1                    | L-Asparagine                    | <a href="http://www.kegg.jp/dbget-bin/www_bget?cpd:C16438">http://www.kegg.jp/dbget-bin/www_bget?cpd:C16438</a>     |
| ribose                          | D-Ribose                        | <a href="http://www.kegg.jp/dbget-bin/www_bget?cpd:C08353">http://www.kegg.jp/dbget-bin/www_bget?cpd:C08353</a>     |
| Ribonic acid, gamma-lactone     | Ribonic acid, gamma-lactone     | <a href="http://www.genome.jp/dbget-bin/www_bget?cpd:C01685">http://www.genome.jp/dbget-bin/www_bget?cpd:C01685</a> |

|                                          |                             |                                                                                                                     |
|------------------------------------------|-----------------------------|---------------------------------------------------------------------------------------------------------------------|
| cyclohexylsulfamic acid 1                | cyclohexylsulfamic acid     | <a href="http://www.kegg.jp/dbget-bin/www_bget?cpd:C02824">http://www.kegg.jp/dbget-bin/www_bget?cpd:C02824</a>     |
| phthalic acid                            | phthalic acid               | NA                                                                                                                  |
| xylitol                                  | xylitol                     | <a href="http://www.kegg.jp/dbget-bin/www_bget?cpd:C00379">http://www.kegg.jp/dbget-bin/www_bget?cpd:C00379</a>     |
| 3,6-Anhydro-D-galactose 1                | 3,6-Anhydro-D-galactose     | NA                                                                                                                  |
| N-formyl-L-methionine 2                  | N-formyl-L-methionine       | <a href="http://www.kegg.jp/dbget-bin/www_bget?cpd:C03145">http://www.kegg.jp/dbget-bin/www_bget?cpd:C03145</a>     |
| alpha-Aminoadipic acid                   | L-alpha-Aminoadipic acid    | <a href="http://www.genome.jp/dbget-bin/www_bget?cpd:C00956">http://www.genome.jp/dbget-bin/www_bget?cpd:C00956</a> |
| Methoxamedrine 2                         | Methoxamine                 | <a href="http://www.kegg.jp/dbget-bin/www_bget?cpd:C07513">http://www.kegg.jp/dbget-bin/www_bget?cpd:C07513</a>     |
| ribitol                                  | ribitol                     | <a href="http://www.kegg.jp/dbget-bin/www_bget?cpd:C00474">http://www.kegg.jp/dbget-bin/www_bget?cpd:C00474</a>     |
| beta-Glycerophosphoric acid              | beta-Glycerophosphoric acid | <a href="http://www.genome.jp/dbget-bin/www_bget?cpd:C02979">http://www.genome.jp/dbget-bin/www_bget?cpd:C02979</a> |
| Acetol 5                                 | Acetol                      | <a href="http://www.kegg.jp/dbget-bin/www_bget?cpd:C05235">http://www.kegg.jp/dbget-bin/www_bget?cpd:C05235</a>     |
| 2-Amino-1-phenylethanol                  | 2-Amino-1-phenylethanol     | <a href="http://www.kegg.jp/dbget-bin/www_bget?cpd:C02735">http://www.kegg.jp/dbget-bin/www_bget?cpd:C02735</a>     |
| Diglycerol 2                             | NA                          | NA                                                                                                                  |
| D-(glycerol 1-phosphate)                 | D-Glycerol 1-phosphate      | <a href="http://www.kegg.jp/dbget-bin/www_bget?cpd:C00093">http://www.kegg.jp/dbget-bin/www_bget?cpd:C00093</a>     |
| Glucose-1-phosphate                      | NA                          | NA                                                                                                                  |
| 2-deoxy-D-glucose 1                      | 2-Deoxy-D-glucose           | <a href="http://www.genome.jp/dbget-bin/www_bget?cpd:C00586">http://www.genome.jp/dbget-bin/www_bget?cpd:C00586</a> |
| O-Phosphorylethanolamine                 | O-Phosphorylethanolamine    | <a href="http://www.kegg.jp/dbget-bin/www_bget?cpd:C00346">http://www.kegg.jp/dbget-bin/www_bget?cpd:C00346</a>     |
| N-Acetyl-L-glutamic acid 2               | N-Acetyl-L-glutamic acid    | <a href="http://www.genome.jp/dbget-bin/www_bget?cpd:C00624">http://www.genome.jp/dbget-bin/www_bget?cpd:C00624</a> |
| (2R)-2-amino-3-phosphonopropanoic acid 2 | NA                          | NA                                                                                                                  |
| thymidine 5'-monophosphate dehydratase   | dTMP                        | <a href="http://www.kegg.jp/dbget-bin/www_bget?cpd:C00364">http://www.kegg.jp/dbget-bin/www_bget?cpd:C00364</a>     |
| terephthalic acid                        | Terephthalic acid           | <a href="http://www.kegg.jp/dbget-bin/www_bget?cpd:C06337">http://www.kegg.jp/dbget-bin/www_bget?cpd:C06337</a>     |
| 9-Fluorenone 2                           | 9-Fluorenone                | <a href="http://www.kegg.jp/dbget-bin/www_bget?cpd:C06712">http://www.kegg.jp/dbget-bin/www_bget?cpd:C06712</a>     |
| 3-phosphoglycerate                       | 3-Phosphoglycerate          | <a href="http://www.genome.jp/dbget-bin/www_bget?cpd:C00197">http://www.genome.jp/dbget-bin/www_bget?cpd:C00197</a> |



|                                 |                            |                                                                                                                     |
|---------------------------------|----------------------------|---------------------------------------------------------------------------------------------------------------------|
| hypoxanthine 1                  | hypoxanthine               | <a href="http://www.kegg.jp/dbget-bin/www_bget?cpd:C00262">http://www.kegg.jp/dbget-bin/www_bget?cpd:C00262</a>     |
| Cysteinylglycine 3              | L-Cysteinylglycine         | NA                                                                                                                  |
| ornithine 1                     | L-Ornithine                | NA                                                                                                                  |
| citric acid                     | Citric acid                | <a href="http://www.kegg.jp/dbget-bin/www_bget?cpd:C00158">http://www.kegg.jp/dbget-bin/www_bget?cpd:C00158</a>     |
| citrulline 1                    | citrulline                 | <a href="http://www.kegg.jp/dbget-bin/www_bget?cpd:C00327">http://www.kegg.jp/dbget-bin/www_bget?cpd:C00327</a>     |
| alpha-D-glucosamine 1-phosphate | D-Glucosamine 1-phosphate  | <a href="http://www.genome.jp/dbget-bin/www_bget?cpd:C06156">http://www.genome.jp/dbget-bin/www_bget?cpd:C06156</a> |
| O-Phosphoserine 1               | O-Phospho-L-serine         | <a href="http://www.genome.jp/dbget-bin/www_bget?cpd:C01005">http://www.genome.jp/dbget-bin/www_bget?cpd:C01005</a> |
| Tagatose 1                      | D-Tagatose                 | NA                                                                                                                  |
| S-carboxymethylcysteine 2       | S-Carboxymethyl-L-cysteine | <a href="http://www.genome.jp/dbget-bin/www_bget?cpd:C03727">http://www.genome.jp/dbget-bin/www_bget?cpd:C03727</a> |
| Myristic Acid                   | Myristic acid              | <a href="http://www.genome.jp/dbget-bin/www_bget?cpd:C06424">http://www.genome.jp/dbget-bin/www_bget?cpd:C06424</a> |
| methionine sulfoxide 1          | L-Methionine S-oxide       | NA                                                                                                                  |
| beta-Mannosylglycerate 2        | NA                         | NA                                                                                                                  |
| O-phosphonothreonine 4          | O-Phospho-L-threonine      | NA                                                                                                                  |
| fructose 1                      | fructose                   | <a href="http://www.kegg.jp/dbget-bin/www_bget?cpd:C01496">http://www.kegg.jp/dbget-bin/www_bget?cpd:C01496</a>     |
| sorbose 1                       | sorbose                    | <a href="http://www.kegg.jp/dbget-bin/www_bget?cpd:C01452">http://www.kegg.jp/dbget-bin/www_bget?cpd:C01452</a>     |
| Gluconic lactone 1              | Gluconic lactone           | <a href="http://www.kegg.jp/dbget-bin/www_bget?cpd:C00198">http://www.kegg.jp/dbget-bin/www_bget?cpd:C00198</a>     |
| Lumazine                        | Lumazine                   | <a href="http://www.genome.jp/dbget-bin/www_bget?cpd:C03212">http://www.genome.jp/dbget-bin/www_bget?cpd:C03212</a> |
| Allantoic acid 2                | Allantoic acid             | <a href="http://www.kegg.jp/dbget-bin/www_bget?cpd:C00499">http://www.kegg.jp/dbget-bin/www_bget?cpd:C00499</a>     |
| glucose 1                       | glucose                    | <a href="http://www.kegg.jp/dbget-bin/www_bget?cpd:C00031">http://www.kegg.jp/dbget-bin/www_bget?cpd:C00031</a>     |
| tyrosine 2                      | tyrosine                   | <a href="http://www.kegg.jp/dbget-bin/www_bget?cpd:C00082">http://www.kegg.jp/dbget-bin/www_bget?cpd:C00082</a>     |
| D-Talose 1                      | D-Talose                   | <a href="http://www.kegg.jp/dbget-bin/www_bget?cpd:C06467">http://www.kegg.jp/dbget-bin/www_bget?cpd:C06467</a>     |
| dl-p-Hydroxyphenyllactic acid   | p-Hydroxyphenyllactate     | <a href="http://www.genome.jp/dbget-bin/www_bget?cpd:C03672">http://www.genome.jp/dbget-bin/www_bget?cpd:C03672</a> |
| D-Altrose 1                     | D-Altrose                  | <a href="http://www.kegg.jp/dbget-bin/www_bget?cpd:C06464">http://www.kegg.jp/dbget-bin/www_bget?cpd:C06464</a>     |

|                                     |                                   |                                                                                                                     |
|-------------------------------------|-----------------------------------|---------------------------------------------------------------------------------------------------------------------|
| galactose 2                         | galactose                         | <a href="http://www.kegg.jp/dbget-bin/www_bget?cpd:C01582">http://www.kegg.jp/dbget-bin/www_bget?cpd:C01582</a>     |
| Atrazine-2-hydroxy 5                | Hydroxyatrazine                   | <a href="http://www.genome.jp/dbget-bin/www_bget?cpd:C06552">http://www.genome.jp/dbget-bin/www_bget?cpd:C06552</a> |
| lysine                              | lysine                            | <a href="http://www.kegg.jp/dbget-bin/www_bget?cpd:C16440">http://www.kegg.jp/dbget-bin/www_bget?cpd:C16440</a>     |
| Methyl Palmitoleate                 | NA                                | NA                                                                                                                  |
| mannitol                            | mannitol                          | <a href="http://www.kegg.jp/dbget-bin/www_bget?cpd:C00392">http://www.kegg.jp/dbget-bin/www_bget?cpd:C00392</a>     |
| sorbitol                            | sorbitol                          | <a href="http://www.kegg.jp/dbget-bin/www_bget?cpd:C00794">http://www.kegg.jp/dbget-bin/www_bget?cpd:C00794</a>     |
| glucuronic acid 2                   | glucuronic acid                   | <a href="http://www.kegg.jp/dbget-bin/www_bget?cpd:C00191">http://www.kegg.jp/dbget-bin/www_bget?cpd:C00191</a>     |
| tyrosine 1                          | tyrosine                          | <a href="http://www.kegg.jp/dbget-bin/www_bget?cpd:C00082">http://www.kegg.jp/dbget-bin/www_bget?cpd:C00082</a>     |
| conduritol b epoxide 2              | NA                                | NA                                                                                                                  |
| Sedoheptulose                       | Sedoheptulose                     | <a href="http://www.kegg.jp/dbget-bin/www_bget?cpd:C02076">http://www.kegg.jp/dbget-bin/www_bget?cpd:C02076</a>     |
| pentadecanoic acid                  | pentadecanoic acid                | <a href="http://www.kegg.jp/dbget-bin/www_bget?cpd:C16537">http://www.kegg.jp/dbget-bin/www_bget?cpd:C16537</a>     |
| D-galacturonic acid 2               | D-Galacturonic acid               | <a href="http://www.genome.jp/dbget-bin/www_bget?cpd:C00333">http://www.genome.jp/dbget-bin/www_bget?cpd:C00333</a> |
| 1-Hexadecanol                       | 1-Hexadecanol                     | <a href="http://www.genome.jp/dbget-bin/www_bget?cpd:C00823">http://www.genome.jp/dbget-bin/www_bget?cpd:C00823</a> |
| 3,5-Dihydroxyphenylglycine 2        | 3,5-Dihydroxy-phenylglycine       | <a href="http://www.genome.jp/dbget-bin/www_bget?cpd:C12026">http://www.genome.jp/dbget-bin/www_bget?cpd:C12026</a> |
| 4-hydroxy-3-methoxycinnamaldehyde 2 | 4-Hydroxy-3-methoxycinnamaldehyde | NA                                                                                                                  |
| N-alpha-Acetyl-L-ornithine 1        | N-Acetylornithine                 | <a href="http://www.kegg.jp/dbget-bin/www_bget?cpd:C00437">http://www.kegg.jp/dbget-bin/www_bget?cpd:C00437</a>     |
| pantothenic acid                    | pantothenic acid                  | <a href="http://www.kegg.jp/dbget-bin/www_bget?cpd:C00864">http://www.kegg.jp/dbget-bin/www_bget?cpd:C00864</a>     |
| Galactonic acid                     | D-Galactonic acid                 | NA                                                                                                                  |
| Guanidinosuccinic acid 3            | Guanidinosuccinic acid            | <a href="http://www.genome.jp/dbget-bin/www_bget?cpd:C03139">http://www.genome.jp/dbget-bin/www_bget?cpd:C03139</a> |
| cytidine-monophosphate 1            | Cytidine-5'-monophosphate         | NA                                                                                                                  |
| palmitoleic acid                    | Palmitoleic acid                  | <a href="http://www.genome.jp/dbget-bin/www_bget?cpd:C08362">http://www.genome.jp/dbget-bin/www_bget?cpd:C08362</a> |
| Glucosaminic acid                   | D-Glucosaminic acid               | <a href="http://www.genome.jp/dbget-bin/www_bget?cpd:C03752">http://www.genome.jp/dbget-bin/www_bget?cpd:C03752</a> |

|                                      |                             |                                                                                                                     |
|--------------------------------------|-----------------------------|---------------------------------------------------------------------------------------------------------------------|
| palmitic acid                        | palmitic acid               | <a href="http://www.kegg.jp/dbget-bin/www_bget?cpd:C00249">http://www.kegg.jp/dbget-bin/www_bget?cpd:C00249</a>     |
| mucic acid                           | mucic acid                  | <a href="http://www.genome.jp/dbget-bin/www_bget?cpd:C00879">http://www.genome.jp/dbget-bin/www_bget?cpd:C00879</a> |
| N-Acetyl-D-galactosamine 1           | N-Acetyl-D-galactosamine    | <a href="http://www.genome.jp/dbget-bin/www_bget?cpd:C01132">http://www.genome.jp/dbget-bin/www_bget?cpd:C01132</a> |
| myo-inositol                         | myo-inositol                | <a href="http://www.kegg.jp/dbget-bin/www_bget?cpd:C00137">http://www.kegg.jp/dbget-bin/www_bget?cpd:C00137</a>     |
| ribose-5-phosphate 2                 | ribose-5-phosphate          | <a href="http://www.genome.jp/dbget-bin/www_bget?cpd:C00117">http://www.genome.jp/dbget-bin/www_bget?cpd:C00117</a> |
| Linoleic acid methyl ester           | NA                          | NA                                                                                                                  |
| ribulose-5-phosphate 1               | D-Ribulose 5-phosphate      | NA                                                                                                                  |
| N-Acetyl-beta-D-mannosamine 4        | NA                          | NA                                                                                                                  |
| guanine 1                            | guanine                     | <a href="http://www.kegg.jp/dbget-bin/www_bget?cpd:C00242">http://www.kegg.jp/dbget-bin/www_bget?cpd:C00242</a>     |
| Glucoheptonic acid 3                 | NA                          | NA                                                                                                                  |
| cis-Phytol                           | NA                          | NA                                                                                                                  |
| heptadecanoic acid                   | NA                          | NA                                                                                                                  |
| d-Glucoheptose 2                     | NA                          | NA                                                                                                                  |
| Octadecanol                          | NA                          | NA                                                                                                                  |
| noradrenaline                        | Noradrenaline               | NA                                                                                                                  |
| Phytol                               | Phytol                      | <a href="http://www.kegg.jp/dbget-bin/www_bget?cpd:C01389">http://www.kegg.jp/dbget-bin/www_bget?cpd:C01389</a>     |
| Indolelactate 1                      | Indolelactate               | <a href="http://www.kegg.jp/dbget-bin/www_bget?cpd:C02043">http://www.kegg.jp/dbget-bin/www_bget?cpd:C02043</a>     |
| Fructose 2,6-biphosphate degr prod 2 | D-Fructose 2,6-bisphosphate | <a href="http://www.genome.jp/dbget-bin/www_bget?cpd:C00665">http://www.genome.jp/dbget-bin/www_bget?cpd:C00665</a> |
| tryptophan 2                         | tryptophan                  | <a href="http://www.kegg.jp/dbget-bin/www_bget?cpd:C00078">http://www.kegg.jp/dbget-bin/www_bget?cpd:C00078</a>     |
| 5-Hydroxyindole-3-acetic acid 1      | 5-Hydroxyindoleacetate      | <a href="http://www.kegg.jp/dbget-bin/www_bget?cpd:C05635">http://www.kegg.jp/dbget-bin/www_bget?cpd:C05635</a>     |
| Elaidic acid                         | Elaidic acid                | <a href="http://www.kegg.jp/dbget-bin/www_bget?cpd:C01712">http://www.kegg.jp/dbget-bin/www_bget?cpd:C01712</a>     |
| linoleic acid                        | linoleic acid               | <a href="http://www.kegg.jp/dbget-bin/www_bget?cpd:C01595">http://www.kegg.jp/dbget-bin/www_bget?cpd:C01595</a>     |
| oleic acid                           | oleic acid                  | <a href="http://www.kegg.jp/dbget-bin/www_bget?cpd:C00712">http://www.kegg.jp/dbget-bin/www_bget?cpd:C00712</a>     |
| stearic acid                         | stearic acid                | <a href="http://www.kegg.jp/dbget-bin/www_bget?cpd:C01530">http://www.kegg.jp/dbget-bin/www_bget?cpd:C01530</a>     |
| pyridoxal phosphate 1                | Pyridoxal phosphate         | <a href="http://www.genome.jp/dbget-bin/www_bget?cpd:C00018">http://www.genome.jp/dbget-bin/www_bget?cpd:C00018</a> |

|                                  |                               |                                                                                                                     |
|----------------------------------|-------------------------------|---------------------------------------------------------------------------------------------------------------------|
| indole-3-acetamide 4             | indole-3-acetamide            | <a href="http://www.kegg.jp/dbget-bin/www_bget?cpd:C02693">http://www.kegg.jp/dbget-bin/www_bget?cpd:C02693</a>     |
| fructose-6-phosphate             | fructose-6-phosphate          | NA                                                                                                                  |
| Phenyl beta-D-glucopyranoside    | Phenyl beta-D-glucopyranoside | <a href="http://www.genome.jp/dbget-bin/www_bget?cpd:C11611">http://www.genome.jp/dbget-bin/www_bget?cpd:C11611</a> |
| glucose-6-phosphate 2            | Aldohexose 6-phosphate        | <a href="http://www.genome.jp/dbget-bin/www_bget?cpd:C03251">http://www.genome.jp/dbget-bin/www_bget?cpd:C03251</a> |
| arachidonic acid                 | arachidonic acid              | <a href="http://www.kegg.jp/dbget-bin/www_bget?cpd:C00219">http://www.kegg.jp/dbget-bin/www_bget?cpd:C00219</a>     |
| Purine riboside                  | Purine riboside               | <a href="http://www.genome.jp/dbget-bin/www_bget?cpd:C01736">http://www.genome.jp/dbget-bin/www_bget?cpd:C01736</a> |
| 6-phosphogluconic acid           | NA                            | <a href="http://www.genome.jp/dbget-bin/www_bget?cpd:C00345">http://www.genome.jp/dbget-bin/www_bget?cpd:C00345</a> |
| N-Acetyl-5-hydroxytryptamine 1   | N-Acetyl-5-hydroxytryptamine  | <a href="http://www.genome.jp/dbget-bin/www_bget?cpd:C00978">http://www.genome.jp/dbget-bin/www_bget?cpd:C00978</a> |
| cytidine-5'-monophosphate        | cytidine-5'-monophosphate     | NA                                                                                                                  |
| Dehydroabiatic Acid              | Dehydroabiatic acid           | <a href="http://www.genome.jp/dbget-bin/www_bget?cpd:C12078">http://www.genome.jp/dbget-bin/www_bget?cpd:C12078</a> |
| cis-gondoic acid                 | NA                            | NA                                                                                                                  |
| uridine 2                        | Uridine                       | <a href="http://www.genome.jp/dbget-bin/www_bget?cpd:C00299">http://www.genome.jp/dbget-bin/www_bget?cpd:C00299</a> |
| Arachidic acid                   | Arachidic acid                | <a href="http://www.genome.jp/dbget-bin/www_bget?cpd:C06425">http://www.genome.jp/dbget-bin/www_bget?cpd:C06425</a> |
| cytidine-monophosphate degr prod | Cytidine-5'-monophosphate     | NA                                                                                                                  |
| D-erythro-sphingosine 1          | Sphingosine                   | <a href="http://www.genome.jp/dbget-bin/www_bget?cpd:C00319">http://www.genome.jp/dbget-bin/www_bget?cpd:C00319</a> |
| saccharopine 3                   | Saccharopine                  | <a href="http://www.genome.jp/dbget-bin/www_bget?cpd:C00449">http://www.genome.jp/dbget-bin/www_bget?cpd:C00449</a> |
| DL-dihydrosphingosine 1          | dihydrosphingosine            | NA                                                                                                                  |
| Neohesperidin                    | Neohesperidin                 | <a href="http://www.genome.jp/dbget-bin/www_bget?cpd:C09806">http://www.genome.jp/dbget-bin/www_bget?cpd:C09806</a> |
| piceatannol 2                    | Piceatannol                   | <a href="http://www.genome.jp/dbget-bin/www_bget?cpd:C05901">http://www.genome.jp/dbget-bin/www_bget?cpd:C05901</a> |
| Diocetyl phthalate               | Diocetyl phthalate            | <a href="http://www.kegg.jp/dbget-bin/www_bget?cpd:C03690">http://www.kegg.jp/dbget-bin/www_bget?cpd:C03690</a>     |
| 2-Monopalmitin                   | NA                            | NA                                                                                                                  |
| androsterone 1                   | androsterone                  | <a href="http://www.kegg.jp/dbget-bin/www_bget?cpd:C00523">http://www.kegg.jp/dbget-bin/www_bget?cpd:C00523</a>     |
| inosine                          | inosine                       | <a href="http://www.kegg.jp/dbget-bin/www_bget?cpd:C00294">http://www.kegg.jp/dbget-bin/www_bget?cpd:C00294</a>     |
| 1-Monopalmitin                   | NA                            | NA                                                                                                                  |

|                                   |                              |                                                                                                                     |
|-----------------------------------|------------------------------|---------------------------------------------------------------------------------------------------------------------|
| sucrose                           | sucrose                      | <a href="http://www.kegg.jp/dbget-bin/www_bget?cpd:C00089">http://www.kegg.jp/dbget-bin/www_bget?cpd:C00089</a>     |
| adenosine                         | adenosine                    | <a href="http://www.kegg.jp/dbget-bin/www_bget?cpd:C00212">http://www.kegg.jp/dbget-bin/www_bget?cpd:C00212</a>     |
| Behenic acid                      | Behenic acid                 | <a href="http://www.genome.jp/dbget-bin/www_bget?cpd:C08281">http://www.genome.jp/dbget-bin/www_bget?cpd:C08281</a> |
| xanthosine                        | Xanthosine                   | <a href="http://www.genome.jp/dbget-bin/www_bget?cpd:C01762">http://www.genome.jp/dbget-bin/www_bget?cpd:C01762</a> |
| lactose 2                         | lactose                      | <a href="http://www.kegg.jp/dbget-bin/www_bget?cpd:C00243">http://www.kegg.jp/dbget-bin/www_bget?cpd:C00243</a>     |
| lactose 2                         | lactose                      | <a href="http://www.kegg.jp/dbget-bin/www_bget?cpd:C00243">http://www.kegg.jp/dbget-bin/www_bget?cpd:C00243</a>     |
| 11-beta-prostaglandin-F-2-alpha 1 | 11-epi-Prostaglandin F2alpha | <a href="http://www.genome.jp/dbget-bin/www_bget?cpd:C05959">http://www.genome.jp/dbget-bin/www_bget?cpd:C05959</a> |
| 2-Monoolein                       | NA                           | NA                                                                                                                  |
| Monoolein                         | NA                           | NA                                                                                                                  |
| Lactobionic Acid 1                | NA                           | NA                                                                                                                  |
| Prostaglandin E2 2                | Prostaglandin E2             | <a href="http://www.kegg.jp/dbget-bin/www_bget?cpd:C00584">http://www.kegg.jp/dbget-bin/www_bget?cpd:C00584</a>     |
| guanosine                         | guanosine                    | <a href="http://www.kegg.jp/dbget-bin/www_bget?cpd:C00387">http://www.kegg.jp/dbget-bin/www_bget?cpd:C00387</a>     |
| Monostearin                       | NA                           | NA                                                                                                                  |
| 2'-deoxyguanosine 1               | 2'-Deoxyguanosine            | <a href="http://www.genome.jp/dbget-bin/www_bget?cpd:C00330">http://www.genome.jp/dbget-bin/www_bget?cpd:C00330</a> |
| chrysin                           | Chrysin                      | <a href="http://www.genome.jp/dbget-bin/www_bget?cpd:C10028">http://www.genome.jp/dbget-bin/www_bget?cpd:C10028</a> |
| Gentiobiose 1                     | Gentiobiose                  | <a href="http://www.genome.jp/dbget-bin/www_bget?cpd:C08240">http://www.genome.jp/dbget-bin/www_bget?cpd:C08240</a> |
| 5'-methylthioadenosine 1          | 5'-Methylthioadenosine       | <a href="http://www.genome.jp/dbget-bin/www_bget?cpd:C00170">http://www.genome.jp/dbget-bin/www_bget?cpd:C00170</a> |
| kyotorphin 4                      | kyotorphin                   | <a href="http://www.kegg.jp/dbget-bin/www_bget?cpd:C02993">http://www.kegg.jp/dbget-bin/www_bget?cpd:C02993</a>     |
| Palatinose                        | Palatinose                   | <a href="http://www.genome.jp/dbget-bin/www_bget?cpd:C01742">http://www.genome.jp/dbget-bin/www_bget?cpd:C01742</a> |
| Lignoceric acid                   | Lignoceric acid              | <a href="http://www.genome.jp/dbget-bin/www_bget?cpd:C08320">http://www.genome.jp/dbget-bin/www_bget?cpd:C08320</a> |
| Uridine monophosphate             | Uridine monophosphate        | <a href="http://www.kegg.jp/dbget-bin/www_bget?cpd:C00105">http://www.kegg.jp/dbget-bin/www_bget?cpd:C00105</a>     |
| Digalacturonic acid 2             | Digalacturonic acid          | <a href="http://www.kegg.jp/dbget-bin/www_bget?cpd:C02273">http://www.kegg.jp/dbget-bin/www_bget?cpd:C02273</a>     |
| 6-hydroxy caproic acid trimer     | 6-Hydroxyhexanoic acid       | <a href="http://www.genome.jp/dbget-bin/www_bget?cpd:C06103">http://www.genome.jp/dbget-bin/www_bget?cpd:C06103</a> |

|                                                |                                            |                                                                                                                     |
|------------------------------------------------|--------------------------------------------|---------------------------------------------------------------------------------------------------------------------|
| 4-Androsten-19-ol-3,17-dione 2                 | 19-Hydroxyandrost-4-ene-3,17-dione         | <a href="http://www.genome.jp/dbget-bin/www_bget?cpd:C05284">http://www.genome.jp/dbget-bin/www_bget?cpd:C05284</a> |
| 5,7-dihydroxy-3-(4-methoxyphenyl)chromen-4-one | Biochanin A                                | <a href="http://www.genome.jp/dbget-bin/www_bget?cpd:C00814">http://www.genome.jp/dbget-bin/www_bget?cpd:C00814</a> |
| 4',5-dihydroxy-7-methoxyisoflavone             | Prunetin                                   | <a href="http://www.genome.jp/dbget-bin/www_bget?cpd:C10521">http://www.genome.jp/dbget-bin/www_bget?cpd:C10521</a> |
| inosine 5'-monophosphate                       | Inosine 5'-monophosphate                   | <a href="http://www.genome.jp/dbget-bin/www_bget?cpd:C00130">http://www.genome.jp/dbget-bin/www_bget?cpd:C00130</a> |
| Galactinol 1                                   | Galactinol                                 | <a href="http://www.kegg.jp/dbget-bin/www_bget?cpd:C01235">http://www.kegg.jp/dbget-bin/www_bget?cpd:C01235</a>     |
| Cerotic acid                                   | NA                                         | NA                                                                                                                  |
| 4-Androsten-11beta-ol-3,17-dione 2             | 4-Androsten-11beta-ol-3,17-dione           | <a href="http://www.kegg.jp/dbget-bin/www_bget?cpd:C05284">http://www.kegg.jp/dbget-bin/www_bget?cpd:C05284</a>     |
| Hesperitin 2                                   | NA                                         | NA                                                                                                                  |
| Adenosine 5'-monophosphate                     | NA                                         | NA                                                                                                                  |
| Tetrahydrocorticosterone 1                     | Tetrahydrocorticosterone                   | <a href="http://www.genome.jp/dbget-bin/www_bget?cpd:C05476">http://www.genome.jp/dbget-bin/www_bget?cpd:C05476</a> |
| Cyclic AMP                                     | Cyclic AMP                                 | <a href="http://www.genome.jp/dbget-bin/www_bget?cpd:C00575">http://www.genome.jp/dbget-bin/www_bget?cpd:C00575</a> |
| 5-Dihydrocortisone 1                           | 4,5beta-Dihydrocortisone                   | <a href="http://www.genome.jp/dbget-bin/www_bget?cpd:C05469">http://www.genome.jp/dbget-bin/www_bget?cpd:C05469</a> |
| 5-Dihydrocortisol 2                            | NA                                         | NA                                                                                                                  |
| 3,7,12-Trihydroxycoprostone 1                  | 3alpha,7alpha,12alpha-Trihydroxycoprostone | <a href="http://www.genome.jp/dbget-bin/www_bget?cpd:C05454">http://www.genome.jp/dbget-bin/www_bget?cpd:C05454</a> |
| Cortexolone 4                                  | NA                                         | NA                                                                                                                  |
| cholesterol                                    | Cholesterol                                | <a href="http://www.genome.jp/dbget-bin/www_bget?cpd:C00187">http://www.genome.jp/dbget-bin/www_bget?cpd:C00187</a> |
| Aldosterone 2                                  | Aldosterone                                | <a href="http://www.genome.jp/dbget-bin/www_bget?cpd:C01780">http://www.genome.jp/dbget-bin/www_bget?cpd:C01780</a> |
| Cholestane-3,5,6-triol, (3beta,5alpha,6beta)-  |                                            |                                                                                                                     |

Sup Figure 1

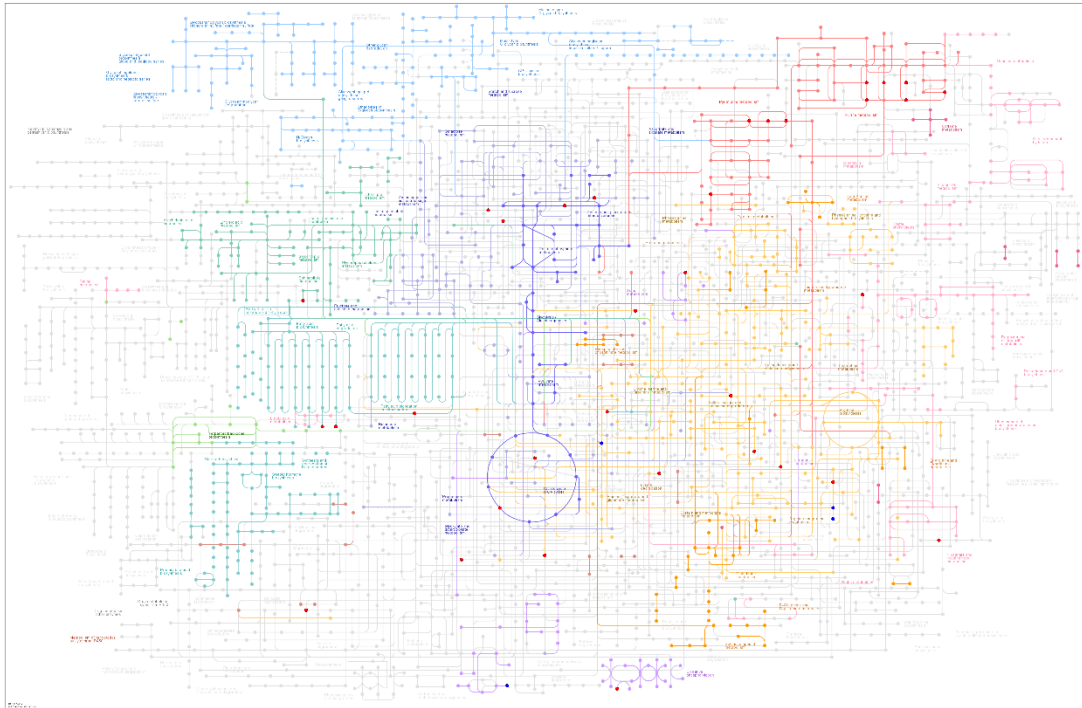

Sup Figure 1: Metabolic pathways with red/blue dots representing the differentially expressed compounds. Bright red dots represented up-regulated metabolites; Bright blue dots represented down-regulated metabolites.
